1 **Siderophore-mediated zinc acquisition enhances enterobacterial colonization of**  
2 **the inflamed gut.**

3 Hui Zhi<sup>1#</sup>, Judith Behnsen<sup>2#¶</sup>, Allegra Aron<sup>3,4</sup>, Vivekanandan Subramanian<sup>5</sup>, Janet Z. Liu<sup>2</sup>,  
4 Romana R. Gerner<sup>1</sup>, Daniel Petras<sup>3,4</sup>, Keith D. Green<sup>6</sup>, Sarah L. Price<sup>7</sup>, Jose Camacho<sup>1</sup>,  
5 Hannah Hillman<sup>1</sup>, Joshua Tjokrosurjo<sup>2</sup>, Nicola P. Montaldo<sup>2</sup>, Evelyn Hoover<sup>2</sup>, Sean  
6 Treacy-Abarca<sup>2</sup>, Benjamin A. Gilston<sup>8</sup>, Eric P. Skaar<sup>9</sup>, Walter J. Chazin<sup>8</sup>, Sylvie Garneau-  
7 Tsodikova<sup>6</sup>, Matthew B. Lawrenz<sup>10</sup>, Robert D. Perry<sup>11</sup>, Sean-Paul Nuccio<sup>1,2</sup>, Pieter C.  
8 Dorrestein<sup>3,4,12</sup>, and Manuela Raffatellu<sup>1,2,12,13\*</sup>

9 <sup>1</sup> Division of Host-Microbe Systems & Therapeutics, Department of Pediatrics, University of California San  
10 Diego, La Jolla, CA 92093, USA

11 <sup>2</sup> Department of Microbiology & Molecular Genetics, University of California Irvine, Irvine, California, USA

12 <sup>3</sup> Skaggs School of Pharmacy and Pharmaceutical Sciences, University of California San Diego, La Jolla,  
13 California, USA

14 <sup>4</sup> Collaborative Mass Spectrometry Innovation Center, University of California, San Diego, La Jolla, CA  
15 92093, United States of America

16 <sup>5</sup> University of Kentucky PharmNMR Center, College of Pharmacy, University of Kentucky, Lexington, KY,  
17 40536-0596, USA

18 <sup>6</sup> Department of Pharmaceutical Sciences, College of Pharmacy, University of Kentucky, Lexington, KY,  
19 40536-0596, USA

20 <sup>7</sup> Department of Microbiology and Immunology, University of Louisville School of Medicine, Louisville, KY,  
21 40202, USA

22 <sup>8</sup> Department of Biochemistry and Chemistry, and Center for Structural Biology, Vanderbilt University  
23 Medical Center, Nashville, Tennessee, USA

24 <sup>9</sup> Department of Pathology, Microbiology, and Immunology, Vanderbilt University Medical Center, Nashville,  
25 Tennessee, USA

26 <sup>10</sup> Center for Predictive Medicine for Biodefense and Emerging Infectious Diseases, Department of  
27 Microbiology and Immunology, University of Louisville School of Medicine, Louisville, KY, 40202, USA

28 <sup>11</sup> Department of Microbiology and Immunology, University of Kentucky, Lexington, Kentucky 40536, USA

29 <sup>12</sup> Center for Microbiome Innovation, University of California San Diego, La Jolla, CA 92093, USA

30 <sup>13</sup> Chiba University-UC San Diego Center for Mucosal Immunology, Allergy, and Vaccines (CU-UCSD  
31 cMAV), La Jolla, CA 92093, USA

32

33 # These authors contributed equally to this work

34 ¶ Present address: Department of Microbiology and Immunology, University of Illinois at Chicago,  
35 Chicago, IL 60612

36

37 \*To whom correspondence should be addressed:

38 Manuela Raffatellu - Email:[manuelar@ucsd.edu](mailto:manuelar@ucsd.edu)

39 **ABSTRACT (150 words)**

40 Zinc is an essential cofactor for bacterial metabolism, and many *Enterobacteriaceae*  
41 express the zinc transporters ZnuABC and ZupT to acquire this metal in the host.  
42 Unexpectedly, the probiotic bacterium *Escherichia coli* Nissle 1917 exhibited appreciable  
43 growth in zinc-limited media even when these transporters were deleted. By utilizing *in*  
44 *vitro* and *in vivo* studies, as well as native spray metal infusion mass spectrometry and  
45 ion identity molecular networking, we discovered that Nissle utilizes yersiniabactin as a  
46 zincophore. Indeed, yersiniabactin enables Nissle to scavenge zinc in zinc-limited media,  
47 to resist calprotectin-mediated zinc sequestration, and to thrive in the inflamed gut.  
48 Moreover, we discovered that yersiniabactin's affinity for iron or zinc changes in a pH-  
49 dependent manner, with higher affinity for zinc as the pH increased. Altogether, we  
50 demonstrate that siderophore metal affinity can be influenced by the local environment  
51 and reveal a mechanism of zinc acquisition available to many commensal and pathogenic  
52 *Enterobacteriaceae*.

53

54 **INTRODUCTION**

55 The *Enterobacteriaceae* are a diverse family of bacteria that inhabit the gastrointestinal  
56 tract. Members of this group include the enteric pathogen *Salmonella enterica* serovar  
57 Typhimurium (*S. Typhimurium*, or STm), as well as *Escherichia coli*, a species that  
58 comprises myriad commensals, pathobionts, and pathogens. Both STm and *E. coli* can  
59 colonize the intestine of mammals and thrive in inflammatory conditions <sup>1-6</sup>. During  
60 homeostasis, the gut microbiota is primarily composed of obligate anaerobes belonging  
61 to the phyla Bacteroidetes and Firmicutes <sup>7</sup>. In the inflamed gut, however, the oxidative  
62 environment suppresses obligate anaerobes and favors the growth of facultative  
63 anaerobes, which include pathogenic and commensal *Enterobacteriaceae* <sup>1,2,4-6,8</sup>.

64

65 One mechanism that enables enterobacterial growth in the inflamed gut is the ability to  
66 scavenge metal nutrients. Many biological processes including DNA replication,  
67 transcription, respiration, and oxidative stress responses require iron, manganese, cobalt,  
68 nickel, copper and/or zinc <sup>9</sup>. Iron is one of the most abundant transition metal ion in living  
69 organisms, and serves as an essential cofactor in central metabolism and respiration <sup>10,11</sup>.

70 The other most abundant is zinc, which is a cofactor for an estimated 5-6% of all proteins  
71 <sup>12</sup>, and whose functions include acting as the catalytic center in enzymes such as  
72 metalloproteases, superoxide dismutases, and metallo- $\beta$ -lactamases. Thus, bacteria  
73 must be able to acquire sufficient amounts of both iron and zinc in order to survive and  
74 replicate in a given environment.

75

76 Bacteria living inside the human host face particular difficulties in obtaining these metal  
77 nutrients. During homeostasis, the availability of such metal ions is actively limited by the  
78 host and by the resident microbiota. Moreover, nutrient metal availability is further  
79 restricted during inflammation in a process termed “nutritional immunity”<sup>13</sup>, wherein the  
80 host secretes antimicrobial proteins that sequester iron, zinc, and manganese from  
81 microbes to limit their growth. We have previously shown that the pathogen STm  
82 overcomes host nutritional immunity by obtaining iron, zinc and manganese in the  
83 inflamed gut<sup>1,14–16</sup>. In response to iron limitation, STm secretes enterobactin and  
84 salmochelin, which are small iron-scavenging molecules called siderophores<sup>17,18</sup>. In  
85 response to zinc limitation, STm expresses the high-affinity zinc transporter ZnuABC  
86<sup>15,19,20</sup>. STm also expresses the ZupT permease, which transports zinc and other divalent  
87 metal ions<sup>21,22</sup>. Independently, each of these transporters has been shown to contribute  
88 to STm virulence in mouse models of infection<sup>15,19,20,23,24</sup>.

89  
90 High-affinity zinc acquisition systems enable microbes to overcome zinc sequestration by  
91 the host protein calprotectin (CP), a heterodimer of the S100A8 and S100A9 proteins<sup>25</sup>.  
92 CP constitutes up to 40% of neutrophil cytosolic content<sup>26</sup>, and the expression of its two  
93 subunits can be induced in epithelial cells following stimulation with IL-17 and IL-22<sup>1,27</sup>.  
94 In the inflamed gut, expression of ZnuABC enables STm to overcome CP-mediated zinc  
95 sequestration, outcompete the microbiota, and colonize to high levels<sup>1,15</sup>.

96  
97 In addition to STm, other *Enterobacteriaceae* can thrive in the inflamed intestine. One  
98 such example is the probiotic bacterium *Escherichia coli* Nissle 1917 (*E. coli* Nissle, or

99 EcN), a strain that was first isolated in WWI from the stool of a soldier who did not develop  
100 gastroenteritis during a *Shigella* outbreak<sup>28</sup>. Since then, EcN has proven to be effective  
101 in the treatment and prevention of intestinal disorders including chronic constipation,  
102 ulcerative colitis, and infantile diarrhea<sup>29–32</sup>. Despite being used as a probiotic for nearly  
103 a century, the mechanisms through which EcN exerts its protective effects are not  
104 completely understood.

105  
106 Our previous work has demonstrated that EcN utilizes multiple iron uptake systems and  
107 secretes antimicrobial proteins known as microcins to outcompete and reduce STm  
108 colonization in mouse models of gastroenteritis<sup>3,33</sup>. As a follow-up to these studies, we  
109 initially sought to investigate the contribution of high-affinity zinc transporters to gut  
110 colonization by EcN. Unexpectedly, we found that an EcN strain lacking ZnuABC and  
111 ZupT was still able to grow appreciably in zinc-limited media, leading us to hypothesize  
112 that EcN expresses an additional means of acquiring zinc. After a genome search did not  
113 yield any promising candidate transporters, we hypothesized that EcN produces and  
114 secretes an unknown zincophore. Using our recently developed native spray  
115 metabolomics approach<sup>34</sup>, we subsequently discovered that EcN produces the  
116 siderophore yersiniabactin (Ybt), which is capable of binding zinc. Moreover, we  
117 demonstrate that EcN utilizes Ybt, in addition to the zinc transporters ZnuABC and ZupT,  
118 to effectively acquire zinc *in vitro*, to resist the antimicrobial activity of CP, and to colonize  
119 the inflamed gut.

120

## 121 **RESULTS**

122 ***E. coli* Nissle is more resistant to calprotectin-mediated zinc sequestration than *S.***  
123 ***Typhimurium*.**

124 We have previously shown that multiple iron uptake systems enable EcN to colonize the  
125 inflamed gut and to compete with STm<sup>33</sup>. As zinc is also limited in the inflamed gut, we  
126 hypothesized that EcN must also have robust mechanisms for acquiring this metal. We  
127 thus compared the growth of EcN to the growth of STm in a rich medium supplemented  
128 with CP, a host antimicrobial protein that sequesters zinc and limits its availability to  
129 microbes<sup>15,25</sup>. To this end, we employed CP concentrations (150-250 µg/ml) comparable  
130 to those found in the inflamed gut<sup>15</sup>. EcN and STm grew to the same density after 16 h  
131 of culture without the addition of CP, or in the presence of 150 µg/ml CP (**Fig. 1a**).  
132 However, we noticed that in media containing CP at 250 µg/ml, EcN grew ~8 times better  
133 than STm (**Fig. 1a**). These results indicated that EcN is more resistant than STm to the  
134 antimicrobial activity of CP *in vitro* and prompted us to investigate the underlying  
135 mechanism.

136  
137 Both EcN and STm encode two known zinc transport systems: the high affinity zinc  
138 transporter ZnuABC and the permease ZupT<sup>15,19,20,23,24</sup>. Although the function of these  
139 two transporters in EcN has not been directly investigated, their disruption significantly  
140 diminishes the capacity of the closely-related uropathogenic *E. coli* strain CFT073 to grow  
141 in zinc-depleted culture media and to cause urinary tract infection<sup>35</sup>. To determine  
142 whether the difference in CP-resistance between EcN and STm is the result of variations  
143 related to ZnuABC and ZupT, we disrupted these transporters in both EcN and STm by  
144 deleting the genes *znuA* and *zupT*. As expected, both mutant strains (EcN *znuA zupT*  
145 and STm *znuA zupT*) grew slower than their respective parental strains in the presence

146 of CP, but not in the presence a Site I/II knockout mutant CP (MU CP; lacks the ability to  
147 bind zinc)<sup>36,37</sup>, or when ZnSO<sub>4</sub> was added to the media (**Fig. 1b**). These results indicated  
148 that ZnuABC and ZupT have similar functions in both EcN and STm, and mediate evasion  
149 of CP-dependent antimicrobial activity.

150

151 Puzzlingly, we observed that the EcN *znuA zupT* mutant grew almost 1,000-fold better  
152 than the STm *znuA zupT* mutant in the presence of 150 µg/ml CP (**Fig. 1b**). Although  
153 higher concentrations of CP (250 µg/ml) reduced the growth of the EcN *znuA zupT* mutant,  
154 it was still 100-fold higher than the STm *znuA zupT* mutant (**Fig. 1c**). As addition of ZnSO<sub>4</sub>  
155 rescued the growth of both the EcN and the STm *znuA zupT* mutants (**Supplementary**  
156 **Fig. 1a**), we posited that EcN is able to acquire zinc via an additional mechanism.

157

158 **A product of the yersiniabactin operon promotes zinc acquisition by *E. coli* Nissle**  
159 **in zinc-limited media.**

160 In iron-limiting conditions, EcN acquires iron by producing the siderophores enterobactin,  
161 salmochelin, aerobactin, and Ybt<sup>33</sup>. Although the importance of siderophores in  
162 scavenging iron has been well-demonstrated in biological systems, chemists have known  
163 for decades that some siderophores can bind other metals besides iron (reviewed in<sup>38</sup>).  
164 Among the siderophores produced by EcN, Ybt has been shown to also bind copper,  
165 gallium, nickel, cobalt, and chromium<sup>39</sup>. Intriguingly, a product of the Ybt gene cluster  
166 has been proposed to contribute to zinc acquisition by the pathogen *Yersinia pestis*<sup>40,41</sup>;  
167 however, its identity and mechanism are unknown, as two prior studies did not provide  
168 evidence of direct zinc binding by Ybt<sup>39,41</sup>. We thus sought to determine whether, in

169 addition to ZnuABC and ZupT, EcN uses a product of the Ybt operon to acquire zinc  
170 under zinc-limiting conditions.

171

172 To this end, we deleted the *ybt* cluster's *irp2* gene that encodes the synthetase HMWP2,  
173 thus rendering EcN unable to synthesize Ybt<sup>42-44</sup>. We also deleted the *ybtX* gene, which  
174 encodes for an inner membrane permease that was found to promote zinc acquisition by  
175 *Y. pestis*<sup>40,41</sup>. Of note, the first published genome sequence of EcN (GenBank  
176 CP007799.1,<sup>45</sup>) indicated that *irp1* and *irp2* were disrupted (frameshifted and insertion  
177 sequence, respectively), although a recent sequencing effort of our lab's EcN strain  
178 revealed these genes to be intact (GenBank CP022686.1), which is consistent with a prior  
179 study showing that EcN produces Ybt<sup>46</sup>. Next, we tested the growth of EcN strains lacking  
180 these genes, in addition to the *znuA zupT* genes, in metal-limiting conditions (M9 minimal  
181 medium). Strains lacking *znuA zupT* and either *irp2* or *ybtX* displayed a severe growth  
182 defect in M9 minimal medium, growing 1,000-fold less than EcN wild-type and more than  
183 10-fold less than EcN *znuA zupT* (**Fig. 1e**). Furthermore, growth of all mutants was  
184 restored in ZnSO<sub>4</sub>-supplemented M9 minimal medium (**Supplementary Fig. 1b**) and in  
185 LB broth without metal limitation (**Supplementary Fig. 1c**), confirming that the observed  
186 growth defects were indeed due to zinc deficiency. Taken together, these results  
187 suggested that a product of the *ybt* gene cluster contributes to zinc acquisition by the  
188 probiotic EcN in zinc-limited media. We therefore hypothesized that the Ybt locus may  
189 encode for the production of a zincophore.

190

191 **Yersiniabactin is a zincophore.**



192 To identify whether the *ybt* gene cluster produces a zincophore, we cultured EcN wild-  
193 type and the *irp2* mutant in M9 minimal media and collected culture pellets and  
194 supernatants to then run ultra-high performance liquid chromatography tandem mass  
195 spectrometry (UHPLC-MS/MS). In addition to running UHPLC-MS/MS metabolomics on  
196 these samples, we performed experiments using post-liquid chromatography (LC) pH  
197 adjustment to 6.8 and infusion of a zinc acetate solution, followed by mass spectrometry,  
198 in order to assess whether any of the metabolites produced were capable of binding zinc  
199 <sup>34</sup>. This native spray metabolomics strategy is then combined with ion identity-based  
200 molecular networking, a new computational and data visualization strategy that allows for  
201 the discovery of mass spectrometry features with the same retention time and predictable  
202 mass offsets <sup>34</sup>; mass spectrometry features with the same retention time and a mass  
203 difference resulting from zinc binding can be discovered directly from complex  
204 metabolomics samples. Using this native spray metabolomics workflow, a number of zinc-  
205 binding small molecules were observed in the wild-type supernatant samples (**Fig. 2a, b**);  
206 zinc-bound nodes (each node represents an MS1 feature and its clustered MS/MS  
207 spectra) are shown in salmon and are connected to protonated nodes (dark blue) with a  
208 blue dashed line (indicating a  $m/z$  delta =  $[Zn^{2+}-H^+]^+$ ) (**Fig. 2a, b**). Furthermore, two peaks  
209 were observed in both culture supernatant (**Fig 2c**) and pellets from EcN wild-type that  
210 were absent in the *irp2* mutant cultured in M9 minimal media (**Fig. 2c**). Feature-based  
211 molecular networking using MZmine 2 in conjunction with Global Natural Products Social  
212 (GNPS) Molecular Networking <sup>47,48</sup> allowed us to putatively identify these two peaks as  
213 Ybt. Ybt is known to tautomerize at C10 (**Fig. 3**) and Ref. <sup>49</sup>. We confirmed that these  
214 peaks were two diastereomers of Ybt by matching the retention time, exact mass, and

215 MS/MS spectra acquired from culture extracts to an authentic Ybt standard (**Fig. 2e, f**).  
216 Post-LC pH neutralization and zinc-infusion revealed the zinc-bound Ybt species,  
217 indicating that Ybt is indeed capable of binding zinc (**Fig. 2d**). To our surprise, we also  
218 found that one of the diastereomers (at retention time = 4.0 min) binds zinc with higher  
219 preference than the other (at retention time = 4.3 min) (**Fig. 2d**). Since Ybt was initially  
220 discovered as an iron-binding molecule, and thus termed a siderophore, we next sought  
221 to determine the preferential conditions for binding iron versus zinc. To assess the  
222 competition between iron and zinc binding, we performed direct infusion mass  
223 spectrometry competition experiments at multiple pH values. In these experiments, we  
224 added equimolar amounts of zinc and iron to Ybt in ammonium acetate buffer adjusted to  
225 pH 4, 7, and 10. While Ybt preferentially bound iron at low pH (pH 4), it exhibited a higher  
226 preference for zinc at high pH (pH 10) (**Fig. 2g**). Intriguingly, at neutral pH (pH 7), Ybt  
227 was observed bound to iron or zinc at roughly equal proportion (**Fig. 2g**).

228  
229 To confirm the zinc-binding observed by native electrospray metabolomics, we monitored  
230 a zinc-titration into Ybt by 1D  $^1\text{H}$  NMR (**Fig. 3**). Although Ybt is in equilibrium between two  
231 tautomers at C10 that have different relative affinities for zinc, only one set of signals is  
232 observed in the spectra. This same observation was reported in earlier studies of gallium  
233 binding to Ybt<sup>49</sup>. The addition of zinc modulates a number of signals, including those of  
234 the NH proton and the two hydroxyl proton peaks at ~11.6, 10.0, and 8.4 ppm. The  
235 intensity of these well resolved peaks decreases progressively upon addition of 0.5 and  
236 1.0 equivalents of zinc, which is consistent with the nitrogen (N10-12) and oxygen (O1  
237 and O13) heteroatoms chelating the zinc atom (**Fig. 3**), in a manner similar to Ybt binding

238 of iron <sup>50</sup> and copper <sup>51</sup>, and zinc binding by the *Pseudomonas* sp.-derived compound  
239 micacocidin A <sup>52</sup>. Finally, we found that increasing the pH of the solution via addition of 0-  
240 5 molar equivalents of NaOD had little effect on the NMR spectrum of zinc-bound Ybt  
241 complex, aside from the exchange of labile hydrogens with deuterium (**Supplementary**  
242 **Fig. 2**), showing that zinc is bound in the same manner across a broad range of pH.

243  
244 Having now discovered that Ybt can bind zinc in a physiologically relevant pH range, we  
245 next tested whether the addition of exogenous Ybt could rescue the growth of an EcN  
246 strain that is highly susceptible to zinc limitation due to mutations in ZnuABC, ZupT, and  
247 Ybt synthesis (*znuA zupT irp2* mutant). Consistent with our hypothesis, supplementation  
248 of M9 minimal media with 1  $\mu$ M purified apo-Ybt (Ybt not bound to iron) rescued the  
249 growth of the EcN *znuA zupT irp2* mutant to similar levels as the *znuA zupT* mutant (**Fig.**  
250 **1e**). Furthermore, the growth of a strain deficient in the putative zinc-transporting inner  
251 membrane protein YbtX (*znuA zupT ybtX*) was not significantly rescued by exogenous  
252 apo-Ybt (**Fig. 1e**). Addition of the siderophore apo-enterobactin, which is not expected to  
253 bind to zinc, did not significantly rescue the growth of either the *znuA zupT irp2* mutant or  
254 the *znuA zupT ybtX* mutant (**Fig. 1e**). Taken together, these results demonstrate that Ybt  
255 binds to both iron and zinc, that metal binding preference can be influenced by pH, and  
256 that Ybt can scavenge zinc for EcN in zinc-limited media. Next, we assessed whether Ybt  
257 enables EcN to evade the host response.

258  
259 ***E. coli* Nissle's higher resistance to calprotectin is due to yersiniabactin-mediated**  
260 **zinc acquisition.**

261 In the host, zinc limitation is largely dependent on the antimicrobial protein CP<sup>53</sup>. We thus  
262 tested whether Ybt-mediated zinc acquisition enhances EcN's growth in CP-  
263 supplemented rich media. Above, we demonstrated that when the ZnuABC and ZupT  
264 transporters were deleted (*znuA zupT* mutants), EcN grew better than STm (**Fig. 1b-d**).  
265 Moving forward, when either *irp2* or *ybtX* were additionally deleted in EcN, growth of the  
266 *znuA zupT irp2* and the *znuA zupT ybtX* mutants were ~8-fold lower than the parental  
267 EcN *znuA zupT* strain in the presence of 150 µg/ml CP (**Fig. 1d**). Although the growth of  
268 EcN *znuA zupT* was further diminished in the presence of 250 µg/ml CP, the growth of  
269 the EcN *znuA zupT irp2* mutant was again ~10-fold lower, and now comparable to that of  
270 the STm *znuA zupT* mutant (**Fig. 1d**). These results are consistent with Ybt scavenging  
271 zinc for EcN when the metal is limited by CP. Because growth of the EcN *znuA zupT ybtX*  
272 mutant was similar to the *znuA zupT* mutant in media supplemented with 250 µg/ml CP,  
273 it is possible that zinc-bound Ybt can also be internalized via a YbtX-independent  
274 mechanism. To confirm that the growth defect of the EcN *znuA zupT irp2* mutant is due  
275 to zinc chelation by CP, we supplemented the medium with 150 µg/ml of CP Site I/II  
276 knockout mutant (**Fig. 1d**), or with 150 µg/ml CP and 5 µM ZnSO<sub>4</sub> (**Supplementary Fig.**  
277 **1a**). In both experiments, all strains grew to the same level. Taken together, these results  
278 indicate that Ybt-mediated zinc acquisition enhances EcN resistance to zinc limitation  
279 induced by CP and provide a mechanistic explanation for EcN's heightened resistance to  
280 zinc limitation relative to STm.

281

282 **Yersiniabactin enhances *E. coli* Nissle colonization of the inflamed gut.**

283 After demonstrating that Ybt promotes EcN resistance to CP *in vitro*, we next sought to  
284 investigate whether Ybt confers a growth advantage to EcN during inflammatory  
285 conditions *in vivo*, where CP is highly expressed<sup>1,15</sup> and zinc is limited<sup>15</sup>. To induce  
286 intestinal inflammation, we employed the dextran sodium sulfate (DSS) mouse colitis  
287 model (**Fig. 4a**). After 4 days of DSS administration, we orally inoculated the mice with a  
288 1:1 mixture of EcN *znuA zupT* and EcN wild-type, or of EcN *znuA zupT* and one of the  
289 EcN triple mutants (*znuA zupT irp2* or *znuA zupT ybtX*).

290  
291 EcN wild-type exhibited a significant competitive advantage over the *znuA zupT* mutant  
292 beginning at day 1 post-inoculation, which increased to an average of ~28-fold by day 7  
293 (**Fig. 4b**). These results indicated that ZnuABC and ZupT are needed for optimal  
294 colonization of the inflamed gut. By contrast, EcN *znuA zupT* showed a significant  
295 competitive advantage over both triple mutants, which increased over time up to ~20-fold  
296 (*znuA zupT ybtX* mutant) and ~50-fold (*znuA zupT irp2* mutant) (**Fig. 4b and 4c**). In both  
297 cases, the increased competitive advantage was due to the decreased colonization level  
298 of the triple mutants, as the *znuA zupT* mutant colonized at similar levels  
299 (**Supplementary Fig. 3a-c**). Of note, host antimicrobial gene expression levels (*Lcn2*,  
300 *S100a8*, *S100a9*) were similarly upregulated in all DSS-treated mice (**Fig. 4d**), and all  
301 DSS-treated mice developed similar levels of colitis, as shown by histopathology  
302 evaluation of the distal colon (**Fig. 4e, f**). Collectively, these results indicate that both Ybt  
303 production (via *Irp2*) and Ybt transport (via *YbtX*) enhance EcN colonization of the  
304 inflamed gut. Because Ybt production and acquisition conferred a colonization advantage

305 to the *znuA zupT* mutant, these data support the idea that Ybt can scavenge zinc *in vivo*,  
306 in zinc-limited conditions such as those found in the inflamed gut.

307

308 **Inflammation and calprotectin are necessary for yersiniabactin to enhance gut**  
309 **colonization by *E. coli* Nissle.**

310 Next, we ascertained whether the zinc transport systems of EcN play a significant role in  
311 the absence of gut inflammation. As EcN colonization levels decline over time in  
312 conventional mice in the absence of inflammation, we used germ-free mice (**Fig. 5a**), in  
313 which we previously observed high levels of EcN colonization for extended periods of  
314 time<sup>3</sup>. When we inoculated germ-free mice with a 1:1 mixture of EcN *znuA zupT* and  
315 *znuA zupT ybtX* (**Fig. 5a**), we recovered similar amounts of both strains from mouse feces  
316 throughout the experiment (**Fig. 5b and Supplementary Fig. 3d**). Whereas *S100a8*,  
317 *S100a9*, and *Lcn2* were highly expressed in the ceca of DSS-treated animals colonized  
318 with EcN, these genes were only minimally upregulated (less than 10-fold) in germ-free  
319 mice colonized with EcN (**Fig. 5c**). The absence of inflammation in EcN-colonized germ-  
320 free mice was also confirmed by cecal pathology (**Supplemental Fig. 3f**, left panel).

321

322 To further probe whether Ybt provides a means for EcN to evade CP-dependent zinc  
323 depletion *in vivo*, we employed *S100a9*<sup>-/-</sup> mice (deficient in CP) treated with DSS, and  
324 inoculated them with a 1:1 mixture of EcN *znuA zupT* and *znuA zupT ybtX* (**Fig. 5d**).  
325 Although the mice developed intestinal inflammation (**Supplementary Fig. 3f**, right panel),  
326 similar amounts of each strain were recovered from these mice lacking CP (**Fig. 5e and**  
327 **Supplementary Fig. 3e**). Taken together, these results indicate that Ybt confers a

328 colonization advantage to EcN in the inflamed gut, by enabling EcN to evade CP-  
329 dependent zinc sequestration.

330

### 331 **Discussion**

332 Commensal and pathogenic *Enterobacteriaceae* exploit host inflammation to achieve  
333 high levels of colonization and outcompete obligate anaerobes; these mechanisms  
334 include the ability to utilize alternative electron acceptors that become available following  
335 the production of reactive oxygen and nitrogen species by activated host cells <sup>5,6</sup>, as well  
336 as new nutrient sources such as lactate <sup>54</sup> and acidic sugars <sup>55</sup>. In addition to taking  
337 advantage of new metabolic resources, *Enterobacteriaceae* must also overcome host-  
338 mediated mechanisms of nutritional immunity, including metal ion starvation <sup>13</sup>.

339

340 We have previously shown that pathogenic STm and probiotic EcN evade lipocalin-2-  
341 mediated iron sequestration in the inflamed gut via the production of stealth siderophores  
342 <sup>16,33</sup>. As we have found that STm also evades CP-mediated zinc sequestration in the  
343 inflamed gut <sup>15</sup>, we sought to investigate whether EcN also evades CP to acquire zinc  
344 and thrive in the host. As EcN, akin to STm, expresses ZnuABC and ZupT, we initially  
345 hypothesized that these zinc transporters mediate EcN resistance to CP. However, when  
346 we found that an EcN *znuA zupT* mutant still grew up to 1,000-fold better than an STm  
347 *znuA zupT* mutant in media containing CP (**Fig. 1**), we speculated that EcN must utilize  
348 additional mechanisms to acquire zinc. In the work presented herein, we unexpectedly  
349 discovered that EcN scavenges zinc with the siderophore Ybt.

350

351 Ybt is a phenolate siderophore that was first discovered as being produced by *Yersinia*  
352 *enterocolitica*<sup>56</sup>. The term siderophore has its origin in the Greek language and means  
353 “iron carrier”, as these molecules are widely characterized as being produced by  
354 microorganisms in order to acquire iron. However, recent studies have proposed that at  
355 least some siderophores may also bind to other metals. For example, the siderophore  
356 ferrioxamine was shown to bind manganese<sup>57,58</sup>, and Ybt was shown to bind copper as  
357 a means to evade toxicity<sup>59</sup> and to scavenge copper *in vitro*<sup>60</sup>. Nevertheless, the extent  
358 and biological relevance for siderophores binding to other metals remains largely  
359 unknown.

360

361 Most of the genes involved in Ybt biosynthesis are grouped in a gene cluster<sup>61,62</sup>. In  
362 addition to *Yersinia* species, many *Enterobacteriaceae* also produce Ybt, including both  
363 pathogenic and commensal *E. coli*<sup>46,63–65</sup>. Ybt is well known for scavenging iron *in vivo*  
364<sup>66</sup>, and plays a critical role in *Y. pestis* virulence<sup>61</sup>. Moreover, Ybt reduces reactive oxygen  
365 species formation in phagocytes by scavenging iron and preventing Haber-Weiss  
366 reactions<sup>67</sup>, as well as contributes to intestinal fibrosis<sup>63</sup>, indicating that Ybt modulates  
367 the host immune response. Incidentally, a product of the *ybt* gene cluster has been  
368 proposed to enable zinc acquisition by *Y. pestis*<sup>40</sup>, although direct binding of Ybt to zinc  
369 was not described in two independent studies<sup>39,41</sup>. Our finding that pH influences binding  
370 of Ybt to zinc is likely a key reason for the lack of binding that was observed in these prior  
371 publications, as they did not assess changing the pH. Moreover, reinterpretation of the  
372 original NMR and UV data in the aforementioned studies does suggest that at least partial  
373 zinc coordination can be seen, as the data show slight UV and NMR shifts that are



374 consistent with only a small amount of Ybt being bound to zinc. Nevertheless, a critical  
375 question remained as to the identity of the molecule(s) produced by the Ybt gene cluster  
376 that contributed to zinc acquisition and, in the context of our study, whether such a  
377 molecule could play a role in gut colonization.

378  
379 Using UHPLC-MS/MS, we identified two diastereomers of Ybt from EcN wild-type  
380 supernatant extract that were not present in the *irp2* mutant supernatant; MS/MS spectra  
381 of both peaks matched the MS/MS spectrum of commercial Ybt. Ybt is known to isomerize  
382 at the C10 position (**Fig. 3**) into a racemic mixture<sup>49</sup>. Using post-LC pH neutralization and  
383 metal infusion in a recently developed workflow termed native metabolomics, we found  
384 that one isomer (retention time = 4.0 min) preferentially binds zinc (**Fig. 2**). The different  
385 affinity of siderophore diastereomers for a metal is not unprecedented. Pyochelin, a  
386 siderophore with a similar thiazoline core as Ybt and produced by *Burkholderia cepacia*  
387 and several *Pseudomonas* strains, also exists as two diastereomers, only one of which  
388 binds iron<sup>68</sup>. Moreover, although pyochelin was shown to bind both iron and zinc *in vitro*  
389<sup>69</sup>, to our knowledge, the biological relevance of pyochelin-mediated zinc scavenging has  
390 not been investigated. Similarly, only one of the Ybt isomers was shown to bind gallium  
391 when the compound's structure was initially characterized<sup>49</sup>. We used 1D <sup>1</sup>H NMR  
392 spectroscopy to confirm this observed zinc binding by Ybt (**Fig. 3**). Specifically, we  
393 observed the loss of signal corresponding to the two OH groups and the NH proton in Ybt,  
394 which indicates the corresponding heteroatoms that chelate the Zn<sup>2+</sup> ion. Although the  
395 other zinc-coordinating atoms were not directly characterized, we hypothesize that Ybt  
396 binds zinc in the same manner as it binds iron and as micacocidin A binds Zn<sup>2+</sup>.

397  
398 Because Ybt is known to bind iron, we performed a competition assay with equimolar  
399 amounts of zinc and iron. We observed that the metal-binding preference of Ybt is pH-  
400 dependent – Ybt preferentially binds to zinc in basic conditions (pH = 10), to iron in acidic  
401 conditions (pH = 4), and exhibits similar preference for both at pH 7 (**Fig. 2e-h**). In contrast  
402 to Ybt, the binding capacity of pyochelin to different metals is pH independent <sup>69</sup>. We  
403 speculate that the pH-dependent metal selectivity of Ybt may confer different functions to  
404 it under various physiological conditions (*e.g.*, inflammation or homeostasis), or different  
405 colonization niches. For instance, in healthy human subjects, the pH in the small intestine  
406 gradually increases from pH 6 in the duodenum to about pH 7.4 in the terminal ileum,  
407 then drops to pH 5.7 in the caecum, but again gradually increases, reaching pH 6.7 in the  
408 rectum <sup>70</sup>. Upon inflammation, the pH in most sections of the gastrointestinal tract further  
409 decreases, but the colon still possesses a higher pH than the small intestine and cecum.  
410 Because dietary iron is mainly absorbed in the small intestine, the ability of Ybt to bind  
411 iron at lower pH may enable EcN and other Ybt-producing bacteria to compete with the  
412 host for iron in the small intestine. On the other hand, the zinc-binding ability of Ybt may  
413 enhance colonization of Ybt-producing bacteria in the colon, where the pH is  
414 higher. Intriguingly, in patients with active inflammatory bowel disease, the pH in many  
415 sections of the intestine increases; for example, the terminal ileum has been observed to  
416 reach up to pH 9.2 <sup>71</sup>.

417  
418 During colitis, neutrophils are recruited to sites of inflammation and secrete high levels of  
419 CP to sequester zinc from invading pathogens <sup>15,25,72</sup>. Our observation that Ybt renders

420 EcN more resistant than STm to zinc sequestration by CP (**Fig. 1**) *in vitro* prompted us to  
421 investigate the function of Ybt during EcN colonization of the inflamed gut. We found that  
422 EcN mutants lacking either Ybt or the putative inner membrane receptor YbtX, in addition  
423 to lacking ZnuABC and ZupT, showed more severe colonization defects than the *znuA*  
424 *zupT* mutant in mice with DSS-induced colitis (**Fig. 4**). As four other iron transport systems  
425 (including the stealth siderophores salmochelin and aerobactin, as well as heme uptake)  
426 are still present in these strains, it is unlikely that the *in vivo* phenotype of the mutants is  
427 due to an inability to overcome iron starvation.

428  
429 Together with the observations that Ybt contributes to optimal growth of EcN in zinc-  
430 limited conditions *in vitro* (**Fig. 1**), and that Ybt directly binds zinc at the pHs found in the  
431 intestine (**Fig. 2**), the colonization defect of EcN *znuA zupT irp2* and of EcN *znuA zupT*  
432 *ybtX* in DSS-treated mice is consistent with the strains' limited ability to acquire zinc.  
433 Moreover, the colonization advantage provided by Ybt is highly dependent on the state  
434 of inflammation and presence of CP, as EcN *znuA zupT* and EcN *znuA zupT ybtX*  
435 colonized to similar levels in *S100a9*<sup>-/-</sup> mice as well as in germ-free mice (which lack  
436 inflammation and only express low levels of CP) (**Fig. 5**). These results are in agreement  
437 with the *in vitro* results showing that Ybt and the putative receptor YbtX enable EcN to  
438 acquire zinc in media supplemented with CP (**Fig. 1**).

439  
440 Altogether, our work demonstrates that Ybt directly binds to zinc in a pH-dependent  
441 manner, and that EcN can use Ybt in physiologic, zinc-limiting conditions and in the  
442 inflamed gut to evade zinc sequestration by CP. Broadly, our study proposes that the role

443 of Ybt and other siderophores may be more complex than previously thought, and may  
444 involve scavenging zinc in the host. Because many commensal and pathogenic  
445 *Enterobacteriaceae* (including *Yersinia* spp., *E. coli*, and *Klebsiella pneumoniae*) produce  
446 Ybt, this important mechanism of zinc acquisition in the gut may also play a role in other  
447 host tissues where pathogens must scavenge zinc.

448

## 449 **MATERIALS AND METHODS**

450 **Bacterial strains, plasmids, and growth conditions.** Bacterial strains and plasmids are  
451 listed in Supplemental Table 1. Cultures of STm and *E. coli* were routinely incubated  
452 either aerobically at 37 °C in Lysogeny broth (LB; per liter: 10 g tryptone, 5 g yeast extract,  
453 10 g NaCl) or on LB agar plates (1.5% Difco agar) overnight. Antibiotics and other  
454 chemicals were added at the following concentrations (mg/L) as needed: carbenicillin  
455 (Carb), 100; chloramphenicol (Cm), 30; kanamycin (Km), 50 or 100; nalidixic acid (Nal),  
456 50; 5-bromo-4-choloro-3-indoyl- $\beta$ -D-galactopyranoside (Xgal), 40. For counterselection  
457 of pJK611, 10 % (w/v) sucrose was added to media.

458

459 ***E. coli* Nissle 1917 mutant generation.** Mutants in EcN and STm were constructed  
460 using either the lambda Red recombinase system or allelic exchange deletion. To  
461 generate mutants with the lambda Red recombinase system<sup>73</sup>, primers (Supplemental  
462 Table 2) homologous to sequences flanking the 5' and 3' ends of the target regions were  
463 designed and were used to replace the selected genes with a chloramphenicol (derived  
464 from pKD3), a kanamycin (derived from pKD4), or a tetracycline resistance cassette  
465 (Supplemental Table 2). Strain names for the mutants are listed in Supplemental Table  
466 1. To confirm integration of the resistance cassette and deletion of the target, mutant

467 strains and wild-type controls were each assayed utilizing PCR, and sequencing primers  
468 (Supplemental Table 2) that flank the target sequence were used in conjunction with a  
469 common test primer to test for both new junction fragments.

470

471 **Bacterial Growth in LB, modified LB supplemented with calprotectin, and M9**

472 **minimal medium.** STm and EcN strains were tested for their ability to grow in nutrient-

473 rich conditions (LB), nutrient-limited conditions (M9 minimal medium per liter; 6.8 g

474 Na<sub>2</sub>HPO<sub>4</sub>, 3 g KH<sub>2</sub>PO<sub>4</sub>, 0.5 g NaCl, 1 g NH<sub>4</sub>Cl, 0.1 mM CaCl<sub>2</sub>, 1 mM MgSO<sub>4</sub>, 0.2 %

475 glucose), and in modified LB supplemented with calprotectin (CP). Bacteria were

476 inoculated into M9 minimal medium from an LB agar plate, then shaken overnight at 37°C.

477 Absorbance ( $\lambda = 600$  nm) of the overnight cultures was determined by spectrophotometry,

478 10<sup>9</sup> colony-forming units (CFU) were harvested by centrifugation, washed with M9

479 medium twice, then serially diluted in M9. For growth assays, 5  $\mu$ l of the 10<sup>7</sup> CFU/ml

480 dilution were used to inoculate 95  $\mu$ l of LB or M9. Growth was assessed by CFU

481 enumeration on agar plates after incubating cultures for 24 hours at 37 °C with shaking.

482 Growth was also tested in M9 minimal medium supplemented with 5  $\mu$ M ZnSO<sub>4</sub>, 1  $\mu$ M

483 apo-yersiniabactin (EMC Microcollections), or 1  $\mu$ M apo-enterobactin (kindly provided by

484 Dr. Elizabeth Nolan, MIT). For growth in modified LB supplemented with CP, 10  $\mu$ l of 10<sup>5</sup>

485 CFU/ml was used to inoculate 90  $\mu$ l of LB supplemented with CP buffer (20 mM Tris pH

486 7.5, 100 mM  $\beta$ -mercaptoethanol, 3 mM CaCl<sub>2</sub>) and 150 or 250  $\mu$ g/ml wild-type CP, or 150

487  $\mu$ g/ml Site I/II mutant CP (MU CP), respectively (10:28:62 ratio of inoculum to LB media

488 to CP buffer). CP was produced as described previously<sup>37</sup>. Growth was assessed by

489 enumerating CFU on agar plates after incubating cultures statically for 16 hours at 37 °C.

490  
491 **Yersiniabactin standard sample preparation for MS.** Yersiniabactin (acquired from  
492 EMC Microcollections, <https://www.microcollections.de/>) stock solutions were prepared  
493 by resuspension of the compound in ethanol to a concentration of 1 mM. A 20  $\mu$ M solution  
494 was prepared for mass spectrometry (MS) analysis. Solutions for analysis were prepared  
495 in 50 % methanol/50 % water. Additional solutions were prepared in water + 0.1 % formic  
496 acid (pH 2.8), in water, or in 10 mM ammonium bicarbonate (pH 7.7).

497  
498 ***E. coli* Nissle sample preparation for MS.** Supernatants from wild-type and *irp2*  
499 knockout *E. coli* Nissle cultures were extracted onto pre-washed SPE cartridges. SPE  
500 cartridges were activated 3x with MeOH (3x 3 ml), then were washed 2x with water + 0.1%  
501 formic acid (3x 3 ml). Sample was loaded dropwise (steady single dripping) onto SPE  
502 cartridges, then cartridges were washed with water + 0.1% formic acid (3x 3 ml). Sample  
503 was eluted into 1.9 ml MeOH, then this was concentrated by speed evaporation at room  
504 temperature. Samples were weighed and reconstituted with 80% MeOH/20% water + 0.1%  
505 FA to a final concentration of 1mg/ml. 5  $\mu$ L of sample were injected per run.

506  
507 **Direct Inject-MS data acquisition.** For MS analysis, 5  $\mu$ l were injected through a  
508 Vanquish UHPLC system into a Q Exactive Orbitrap mass spectrometer (Thermo Fisher  
509 Scientific, Bremen, Germany). A flow rate between 0.2 ml/min and 0.4 ml/min was used  
510 for experiments. Data acquisition was performed in MS1 in positive mode. Electrospray  
511 ionization (ESI) parameters were set to 52 L/min sheath gas flow, 14 L/min auxiliary gas  
512 flow, 0 L/min sweep gas flow, and 400 °C auxiliary gas temperature. The spray voltage

513 was set to 3.5 kV and the inlet capillary to 320 °C. 50 V S-lens level was applied. MS scan  
514 range was set to 150-1500 m/z with a resolution at m/z 200 ( $R_{m/z\ 200}$ ) of 35,000 with one  
515 micro-scan. The maximum ion injection time was set to 100 ms with an automated gain  
516 control (AGC) target of 1.0E6.

517  
518 **UHPLC-MS/MS data acquisition.** For LC-MS/MS analysis, 5 µl were injected into a  
519 Vanquish UHPLC system coupled to a Q Exactive Orbitrap mass spectrometer (Thermo  
520 Fisher Scientific, Bremen, Germany). For the chromatographic separation, a C18 porous  
521 core column (Kinetex C18, 50 x 2 mm, 1.8 µm particle size, 100 Angstrom pore size,  
522 Phenomenex, Torrance, USA) was used. For gradient elution, a high-pressure binary  
523 gradient system was used. The mobile phase consisted of solvent A (H<sub>2</sub>O + 0.1 % FA)  
524 and solvent B (acetonitrile + 0.1 % FA). The flow rate was set to 0.5 ml/min. After injection,  
525 the samples were eluted with the following linear gradient: 0-0.5 min 5 % B, 0.5-5 min 5-  
526 99 % B, followed by a 2 min washout phase at 99% B and a 3 min re-equilibration phase  
527 at 5% B. Data-dependent acquisition (DDA) of MS/MS spectra was performed in positive  
528 mode. ESI parameters were set to 52 L/min sheath gas flow, 14 L/min auxiliary gas flow,  
529 0 L/min sweep gas flow, and 400 °C auxiliary gas temperature. The spray voltage was  
530 set to 3.5 kV and the inlet capillary to 320 °C. 50 V S-lens level was applied. MS scan  
531 range was set to 150-1500 m/z with a resolution at m/z 200 ( $R_{m/z\ 200}$ ) of 35,000 with one  
532 micro-scan. The maximum ion injection time was set to 100 ms with an AGC target of  
533 1.0E6. Up to 5 MS/MS spectra per MS1 survey scan were recorded in DDA mode with  
534  $R_{m/z\ 200}$  of 17,500 with one micro-scan. The maximum ion injection time for MS/MS scans  
535 was set to 100 ms with an AGC target of 3.0E5 ions and minimum 5% C-trap filling. The

536 MS/MS precursor isolation window was set to  $m/z$  1. Normalized collision energy was set  
537 to a stepwise increase from 20 to 30 to 40% with  $z = 1$  as default charge state. MS/MS  
538 scans were triggered at the apex of chromatographic peaks within 2 to 15 s from their first  
539 occurrence. Dynamic precursor exclusion was set to 5 s. Ions with unassigned charge  
540 states were excluded from MS/MS acquisition as well as isotope peaks.

541  
542 **Post LC-MS/MS pH neutralization and metal addition for native spray mass**  
543 **spectrometry.** A stock solution of 160 mM  $Zn(CH_3CO_2)_2$  was prepared, then diluted to a  
544 final concentration of 3.2 mM. A stock solution of ammonium hydroxide at 1 M was also  
545 prepared. Sample was run through a C18 column at a flow rate of 0.5 ml/min. Before  
546 electrospray, a neutralizing solution of 1 M ammonium hydroxide was added at a flow rate  
547 of 5  $\mu$ l/min, then the solution of 3.2 mM zinc acetate was added at a flow rate of 5  $\mu$ l/min.  
548 Post-LC pH was verified by collecting the flow through and spotting on pH paper (Sigma).

549  
550 **Ion identity molecular networking of wild-type *E. coli* Nissle supernatant extracts**  
551 **with post-LC zinc infusion.** MS was run as described in the LC-MS/MS data acquisition  
552 section. MS/MS spectra were converted to .mzML files using MSconvert (ProteoWizard)  
553 <sup>74</sup>. All raw and processed data is publicly available at  
554 <ftp://massive.ucsd.edu/MSV000083387/>. MS1 feature extraction and MS/MS pairing was  
555 performed with MZMine 2.37corr17.7\_kai\_merge2 <sup>34,75,76</sup>. An intensity threshold of 1E6  
556 for MS1 spectra and of 1E3 for MS/MS spectra was used. MS1 chromatogram building  
557 was performed within a 10 ppm mass window and a minimum peak intensity of 3E5 was  
558 set. Extracted Ion Chromatograms (XICs) were deconvoluted using the local minimum



559 search algorithm with a chromatographic threshold of 0.01%, a search minimum in RT  
560 range of 0.1 min, and a median m/z center calculation with m/z range for MS2 pairing of  
561 0.01 and RT range for MS2 scan pairing of 0.2. After chromatographic deconvolution,  
562 MS1 features linked to MS/MS spectra within 0.01 m/z mass and 0.2 min retention time  
563 windows. Isotope peaks were grouped and features from different samples were aligned  
564 with 10 ppm mass tolerance and 0.1 min retention time tolerance. MS1 peak lists were  
565 joined using an m/z tolerance of 10 ppm and retention time tolerance of 0.1 min; alignment  
566 was performed by placing a weight of 75 on m/z and 25 on retention time. Gap filling was  
567 performed using an intensity tolerance of 10%, an m/z tolerance of 10 ppm, and a  
568 retention tolerance of 0.1. Correlation of co-eluting features was performed with the  
569 metaCorrelate module; retention time tolerance of 0.1, minimum height of 1E5, noise level  
570 of 1E4 were used. A correlation of 85 was set as the cutoff for the min feature shape corr.  
571 The following adducts were searched:  $[M + H]^+$ ,  $[M + Na]^+$ ,  $[M + K]^+$ ,  $[M + Ca^{2+}]^{2+}$ ,  $[M +$   
572  $Zn^{2+} - H]^+$ , and  $[M - H_2O]$ , with an m/z tolerance of 10 ppm, a maximum charge of 2, and  
573 maximum molecules/cluster of 2. Peak areas and feature correlation pairs were exported  
574 as .csv files and the corresponding consensus MS/MS spectra were exported as an .mgf  
575 file. For spectral networking and spectrum library matching, the .mgf file was uploaded to  
576 the feature-based molecular networking workflow on GNPS ([gnps.ucsd.edu](http://gnps.ucsd.edu))<sup>47,48,77</sup>. For  
577 spectrum library matching and spectral networking, the minimum cosine score to define  
578 spectral similarity was set to 0.7. The Precursor and Fragment Ion Mass Tolerances were  
579 set to 0.01 Da and Minimum Matched Fragment Ions to 4, Minimum Cluster Size to 1 (MS  
580 Cluster off). When Analog Search was performed, the maximum mass difference was set  
581 to 100 Da. The GNPS job for the siderophore mix can be accessed:

582 <https://gnps.ucsd.edu/ProteoSAFe/status.jsp?task=525fd9b6a9f24455a589f2371b1d95>  
583 [40](#). All .csv and .mgf files in addition to MZmine 2 project can be accessed at  
584 <ftp://massive.ucsd.edu/MSV000083387>. Mgf files were exported for SIRIUS in MZmine2,  
585 then molecular formulas were determined using SIRIUS 4.0.1 (build 9)<sup>78</sup> and molecular  
586 formulas can be accessed:  
587 <http://gnps.ucsd.edu/ProteoSAFe/status.jsp?task=e2bd16458ec34f3f9f99982dedc7d15>  
588 [8](#).

589  
590 **Metal competition MS experiments.** Commercial yersiniabactin (dissolved to 1 mM in  
591 ethanol) was added to 10 mM ammonium acetate buffer at a defined pH (as determined  
592 by pH meter, Denver Instrument UltraBasic) for a final concentration of 10  $\mu$ M. Acetic acid  
593 was added to the buffer to lower the pH to 4, and ammonium hydroxide was added to the  
594 buffer to raise the pH to 10. Solutions of zinc acetate and iron chloride were prepared to  
595 a final concentration of 10 mM in water; from this solution, both iron and zinc were added  
596 to a final solution of 100  $\mu$ M.

597  
598 **Data sharing.** All mass spectrometry .raw and centroid .mzXML or .mzML files, in  
599 addition to MZmine 2 outputs and project file, are publicly available in the mass  
600 spectrometry interactive virtual environment (MassIVE) under massive.ucsd.edu with  
601 project identifier [MSV000083387](#) (*E. coli* Nissle siderophores); raw spectra of  
602 yersiniabactin commercial standards are available under [MSV000084237](#) (Siderophore  
603 Standard Mixture with metal additions). Ion Identity Molecular Networks can be accessed  
604 through gnps.ucsd.edu under direct links:

605 <https://gnps.ucsd.edu/ProteoSAFe/status.jsp?task=525fd9b6a9f24455a589f2371b1d95>

606 [40](#) and

607 <http://gnps.ucsd.edu/ProteoSAFe/status.jsp?task=e2bd16458ec34f3f9f99982dedc7d15>

608 [8](#).

609

610 **NMR experiments and signal assignments.** All NMR experiments were performed on  
611 a Varian 500 MHz spectrometer equipped with a  $^1\text{H}$  channel cold-probe. The  
612 yersiniabactin (Ybt, 0.25 mg) sample was dissolved in deuterated acetonitrile ( $\text{CD}_3\text{CN}$ ,  
613 300  $\mu\text{l}$ ). The NMR spectra were acquired at 298 K in 3-mm NMR tubes and raw data were  
614 processed using Bruker Topspin version 4.0.7. The  $^1\text{H}$  peaks resonance assignments  
615 were made using a combination of 2D COSY (**Supplementary Fig. 2b**), 2D ROESY with  
616 a mixing time of 300 ms (**Supplementary Fig. 2c**), and natural abundance  $^1\text{H}$ - $^{13}\text{C}$  HSQC  
617 (not shown) spectra. The assignments were made with the assistance of NMRFAM-  
618 SPARKY. The 1D experiments were acquired with a relaxation delay of 1 sec, 90-degree  
619  $^1\text{H}$  pulses of about 9.0  $\mu\text{s}$ , and a spectral width of 8000 Hz. 2D ROESY spectra were  
620 acquired with a spinlock of 200-300 ms, using 128 transients per FID, and 128 points in  
621 the indirect dimension. The natural abundance  $^{13}\text{C}$ - $^1\text{H}$  HSQC spectrum was acquired  
622 using phase-sensitive sequence using TPPI gradient selection, optimized for a  
623 heteronuclear coupling constant of 145 Hz, shaped pulses for all 180-degree pulses on  
624 the  $^1\text{H}$  channel, H decoupling during acquisition, sensitivity enhance acquisition, and  
625 gradient back-INEPT.

626

627 **Zn binding and base titration for NMR studies.** 1D  $^1\text{H}$  NMR titration experiments were  
628 carried out to investigate the binding of  $\text{Zn}^{2+}$  (added as  $\text{ZnCl}_2$ ) to Ybt. Ybt (0.25 mg) was  
629 dissolved in deuterated acetonitrile ( $\text{CD}_3\text{CN}$ , 300  $\mu\text{l}$ ) then a baseline spectrum was taken.  
630 A spectrum was recorded between each addition of  $\text{ZnCl}_2$ . 0.5 equiv. of  $\text{ZnCl}_2$  dissolved  
631 in  $\text{CD}_3\text{CN}$  was added to the dissolved Ybt, followed by a second 0.5 equiv. (1 equiv. total),  
632 another 1 equiv. (2 equiv. total), and finally another 3 equiv. (5 equiv. total). Once the  
633 spectrum with 5 equiv. of  $\text{ZnCl}_2$  was recorded, an NaOD (in  $\text{D}_2\text{O}$ ) titration was performed  
634 to determine the effect of increasing pH on the binding of  $\text{Zn}^{2+}$ . Sequential additions of  
635 0.5 equiv., a second 0.5 equiv., 1 equiv., and 3 equiv. were made and 1D  $^1\text{H}$  NMR spectra  
636 were recorded for each titration point.

637

638 **Mouse Experiments.** Germ-free Swiss Webster mice as well as specific pathogen-free  
639 C57BL/6 wild-type mice and  $S100a9^{-/-}$  mice were used in our study, in accordance with  
640 protocols and guidelines approved by the Institutional Animal Care and Use Committee  
641 of the University of California, Irvine and the University of California, San Diego. C57BL/6  
642 mice were purchased from Jackson Lab, whereas  $S100a9^{-/-}$  mice<sup>79</sup> were bred in-house.  
643 Germ-free Swiss Webster mice were purchased from Taconic Farms and then bred in-  
644 house in germ-free isolators (Park Bio). For experiments, germ-free mice were transferred  
645 to sterile housing inside a biosafety cabinet, then colonized with the respective bacterial  
646 strains. For chemical colitis experiments using dextran sodium sulfate (DSS), mice were  
647 administered 4% (w/v) DSS (MP Biomedicals) in the drinking water beginning 4 days prior  
648 to administering bacteria, then provided a fresh 4% DSS solution one day prior. On the  
649 day of inoculation, mice were switched to 2% (w/v) DSS in the drinking water and orally

650 gavaged with  $1 \times 10^9$  CFU of a mixture of strains at a 1:1 ratio, as indicated. A fresh 2%  
651 DSS solution was provided on day 4 post-inoculation. At day 7 post-inoculation, mice  
652 were humanely euthanized. Fecal content was collected on days 1, 4, and 7, and CFU  
653 were enumerated by plating on appropriate selective agar media. In all mixed inoculation  
654 experiments, the competitive index of the EcN strains used in each group were calculated.  
655 Groups of 5-10 male and female mice were used for each experiment.

656

657 **Quantitative real-time PCR.** Total RNA was extracted from cecal and colon tissues of  
658 wild-type mice, or cecal tissues of germ-free mice, with TRI Reagent (Sigma-Aldrich),  
659 followed by processing with an RNeasy Mini Plus kit (Qiagen). For analyzing gene  
660 expression by quantitative real-time PCR, cDNA from each RNA sample was prepared  
661 with the SuperScript IV VILO Master Mix with ezDNase kit (ThermoFisher). Real-time  
662 qPCR was performed with PowerUp SYBR Green Master Mix (ThermoFisher) and a  
663 QuantStudio 5 (ThermoFisher). Data were analyzed using the comparative  $2^{-\Delta\Delta C_t}$  method.  
664 Target gene expression in each tissue sample was normalized to the respective levels of  
665 *Actb* mRNA ( $\beta$ -actin), and compared to uninfected samples.

666

667 **Histopathology.** Distal colonic tissues from wild-type mice, proximal colonic tissues from  
668 *S100a9<sup>-/-</sup>* mice, and cecal tissues from germ-free mice were fixed in 10% buffered  
669 formalin, then processed according to standard procedures for paraffin embedding. 5  $\mu$ m  
670 sections were stained with hematoxylin and eosin, then slides were scanned on a  
671 NanoZoomer Slide scanner (Hamamatsu) and scored in a blinded fashion as previously  
672 described <sup>3</sup>, with minor modifications. Briefly, each of four histological criteria

673 (mononuclear infiltration, edema, epithelial injury, and neutrophilic inflammation/crypt  
674 abscesses) was determined as absent (0), mild (1), moderate (2), or severe (3).  
675 Furthermore, each parameter was assigned an extent factor reflecting its overall  
676 involvement ranging from 1 (<10%), 2 (10-25%), 3 (25-50%), and 4 (>50%). Scores  
677 represent the sum of the above scores in colon or cecum sections.

678

679 **Statistical Analysis.** CFU data were transformed to  $\text{Log}_{10}$  and passed a normal  
680 distribution test before running statistical analyses. CFU from *in vitro* growth experiments  
681 and mouse experiments were compared by one-way ANOVA followed by Tukey's multiple  
682 comparisons test. An adjusted *P* value equal to or below 0.05 was considered statistically  
683 significant; \* indicates a *P* value  $\leq 0.05$ , \*\* *P* value  $\leq 0.01$ , \*\*\* *P* value  $\leq 0.001$ , \*\*\*\* *P* value  
684  $\leq 0.0001$ . For qPCR data analysis, a multiple *t*-test was performed on gene expression  
685 levels between *znuA zupT/znuA zupT ybtX* treated wild-type mice and germ-free mice; \*  
686 indicates a *P* value  $\leq 0.05$ , \*\* *P* value  $\leq 0.01$ .

687

688

## 689 **Acknowledgements**

690 Work in MR lab is supported by Public Health Service Grants AI126277, AI114625,  
691 AI145325, by the Chiba University-UCSD Center for Mucosal Immunology, Allergy, and  
692 Vaccines, and by the UCSD Department of Pediatrics. M.R. also holds an Investigator in  
693 the Pathogenesis of Infectious Disease Award from the Burroughs Wellcome Fund. RRG  
694 was partly supported by a fellowship from the Max Kade Foundation and by a fellowship  
695 from the Crohns and Colitis Foundation. Work in the EPS and WJC laboratories is

696 supported by Public Health Service Grant AI101171. MBL was supported by NIH grants  
697 P20GM125504, R21AI119557, and in part by a grant from the Jewish Heritage Fund for  
698 Excellence Research Enhancement Grant Program at the University of Louisville School  
699 of Medicine. SLP was supported by T32AI132146 and F31AI147404. PCD acknowledges  
700 the support by NIH for this work under 5U01AI124316, P41GM103484,  
701 GMS10RR029121, and Gordon and Betty Moore Foundation for the development of the  
702 computational infrastructure to study symbiotic interactions. The authors would like to  
703 thank Joe Burlison in the Medicinal Chemistry Lab at the James Graham Brown Cancer  
704 Center at the University of Louisville for help with Ybt purification and the UK PharmNMR  
705 Center in the College of Pharmacy at the University of Kentucky for NMR support.

706

#### 707 **Author contributions**

708 JB and MR conceived the overall study. JB, JZL, HZ, S-PN, MR designed the *in vitro*  
709 growth assays and the *in vivo* experiments and analyzed the data. JB, JZL, HZ, RRG, JC,  
710 HH, JT, NPM, EH, and ST-A performed the *in vitro* growth assays and the *in vivo*  
711 experiments. AA, DP, and PCD designed the MS experiments and analyzed the data. AA  
712 and DP ran the MS experiments. VS performed the NMR experiments and analyzed the  
713 data. KDG and SLP performed Ybt extractions for NMR experiments and analyzed the  
714 data. SG-T and MBL designed the NMR experiments and analyzed the NMR data. BAG,  
715 EPS, and WJC designed *in vitro* growth assays and provided key reagents. RRG  
716 analyzed the histopathology. S-PN performed comparative genomic analysis. WJC, AA,  
717 PCD, and RDP analyzed and discussed the NMR data. JB, JZL, HZ, AA, WJC, S-PN,

718 PCD, and MR wrote the paper. EPS, WJC, SG-T, MBL, RDP, PCD and MR provided  
719 supervision and funding support.

720

721 **Conflict of interest.**

722 PCD is on the scientific advisory board to Sirenas, Cybele, Microbiome, and Galileo.

723

724

725 **References**

- 726 1. Behnsen, J. *et al.* The Cytokine IL-22 Promotes Pathogen Colonization by Suppressing  
727 Related Commensal Bacteria. *Immunity* **40**, 262–73 (2014).
- 728 2. Lupp, C. *et al.* Host-mediated inflammation disrupts the intestinal microbiota and promotes  
729 the overgrowth of Enterobacteriaceae. *Cell Host Amp Microbe* **2**, 119–129 (2007).
- 730 3. Sassone-Corsi, M. *et al.* Microcins mediate competition among Enterobacteriaceae in the  
731 inflamed gut. *Nature* **540**, 280–283 (2016).
- 732 4. Stecher, B. *et al.* Salmonella enterica serovar typhimurium exploits inflammation to compete  
733 with the intestinal microbiota. *PLoS Biol.* **5**, 2177–2189 (2007).
- 734 5. Winter, S. E. *et al.* Gut inflammation provides a respiratory electron acceptor for *Salmonella*.  
735 *Nature* **467**, 426–9 (2010).
- 736 6. Winter, S. E. *et al.* Host-derived nitrate boosts growth of *E. coli* in the inflamed gut. *Science*  
737 **339**, 708–11 (2013).
- 738 7. Huttenhower, C. *et al.* Structure, function and diversity of the healthy human microbiome.  
739 *Nature* **486**, 207–214 (2012).
- 740 8. Rivera-Chávez, F. *et al.* Depletion of Butyrate-Producing Clostridia from the Gut Microbiota  
741 Drives an Aerobic Luminal Expansion of Salmonella. *Cell Host Microbe* **19**, 443–454 (2016).



- 742 9. Palmer, L. D. & Skaar, E. P. Transition Metals and Virulence in Bacteria. *Annu. Rev. Genet.*  
743 **50**, 67–91 (2016).
- 744 10. Bertini, I., Gray, H. B., Lippard, S. J. & Valentine, J. S. *Bioinorganic Chemistry*. (University  
745 Science Books, 1994).  
746 doi:[https://authors.library.caltech.edu/25052/10/BioinCh\\_chapter9.pdf](https://authors.library.caltech.edu/25052/10/BioinCh_chapter9.pdf).
- 747 11. Maret, W. The Metals in the Biological Periodic System of the Elements: Concepts and  
748 Conjectures. *Int. J. Mol. Sci.* **17**, (2016).
- 749 12. Andreini, C., Banci, L., Bertini, I. & Rosato, A. Zinc through the three domains of life. *J*  
750 *Proteome Res* **5**, 3173–8 (2006).
- 751 13. Hood, M. I. & Skaar, E. P. Nutritional immunity: transition metals at the pathogen-host  
752 interface. *Nat Rev Microbiol* **10**, 525–37 (2012).
- 753 14. Diaz-Ochoa, V. E. *et al.* Salmonella Mitigates Oxidative Stress and Thrives in the Inflamed  
754 Gut by Evading Calprotectin-Mediated Manganese Sequestration. *Cell Host Microbe* **19**,  
755 814–25 (2016).
- 756 15. Liu, J. Z. *et al.* Zinc sequestration by the neutrophil protein calprotectin enhances  
757 Salmonella growth in the inflamed gut. *Cell Host Microbe* **11**, 227–239 (2012).
- 758 16. Raffatellu, M. *et al.* Lipocalin-2 resistance confers an advantage to Salmonella enterica  
759 serotype Typhimurium for growth and survival in the inflamed intestine. *Cell Host Amp*  
760 *Microbe* **5**, 476–486 (2009).
- 761 17. Hantke, K., Nicholson, G., Rabsch, W. & Winkelmann, G. Salmochelins, siderophores of  
762 Salmonella enterica and uropathogenic Escherichia coli strains, are recognized by the outer  
763 membrane receptor IroN. *Proc Natl Acad Sci U A* **100**, 3677–82 (2003).
- 764 18. Raymond, K. N., Dertz, E. A. & Kim, S. S. Enterobactin: an archetype for microbial iron  
765 transport. *Proc Natl Acad Sci U A* **100**, 3584–8 (2003).

- 766 19. Ammendola, S. *et al.* High-affinity Zn<sup>2+</sup> uptake system ZnuABC is required for bacterial zinc  
767 homeostasis in intracellular environments and contributes to the virulence of *Salmonella*  
768 *enterica*. *Infect Immun* **75**, 5867–76 (2007).
- 769 20. Campoy, S. *et al.* Role of the high-affinity zinc uptake znuABC system in *Salmonella*  
770 *enterica* serovar typhimurium virulence. *Infect Immun* **70**, 4721–5 (2002).
- 771 21. Grass, G. *et al.* The metal permease ZupT from *Escherichia coli* is a transporter with a  
772 broad substrate spectrum. *J Bacteriol* **187**, 1604–11 (2005).
- 773 22. Taudte, N. & Grass, G. Point mutations change specificity and kinetics of metal uptake by  
774 ZupT from *Escherichia coli*. *Biometals* **23**, 643–56 (2010).
- 775 23. Cerasi, M. *et al.* The ZupT transporter plays an important role in zinc homeostasis and  
776 contributes to *Salmonella enterica* virulence. *Metallomics* (2014) doi:10.1039/c3mt00352c.
- 777 24. Karlinsey, J. E., Maguire, M. E., Becker, L. A., Crouch, M. L. & Fang, F. C. The phage shock  
778 protein PspA facilitates divalent metal transport and is required for virulence of *Salmonella*  
779 *enterica* sv. Typhimurium. *Mol Microbiol* **78**, 669–85 (2010).
- 780 25. Corbin, B. D. *et al.* Metal chelation and inhibition of bacterial growth in tissue abscesses.  
781 *Science* **319**, 962–5 (2008).
- 782 26. Teigelkamp, S. *et al.* Calcium-dependent complex assembly of the myeloid differentiation  
783 proteins MRP-8 and MRP-14. *J Biol Chem* **266**, 13462–7 (1991).
- 784 27. Liang, S. C. *et al.* Interleukin (IL)-22 and IL-17 are coexpressed by Th17 cells and  
785 cooperatively enhance expression of antimicrobial peptides. *J Exp Med* **203**, 2271–9 (2006).
- 786 28. Nissle, A. [Explanations of the significance of colonic dysbacteria & the mechanism of action  
787 of *E. coli* therapy (mutaflor)]. *Medizinische* **4**, 1017–22 (1959).
- 788 29. Kruis, W. *et al.* Maintaining remission of ulcerative colitis with the probiotic *Escherichia coli*  
789 Nissle 1917 is as effective as with standard mesalazine. *Gut* **53**, 1617–23 (2004).

- 790 30. Kuzela, L., Kascak, M. & Vavrecka, A. Induction and maintenance of remission with  
791 nonpathogenic *Escherichia coli* in patients with pouchitis. *Am. J. Gastroenterol.* **96**, 3218–  
792 3219 (2001).
- 793 31. Lodinova-Zadnikova, R. & Sonnenborn, U. Effect of preventive administration of a  
794 nonpathogenic *Escherichia coli* strain on the colonization of the intestine with microbial  
795 pathogens in newborn infants. *Biol Neonate* **71**, 224–32 (1997).
- 796 32. Mollenbrink, M. & Bruckschen, E. [Treatment of chronic constipation with physiologic  
797 *Escherichia coli* bacteria. Results of a clinical study of the effectiveness and tolerance of  
798 microbiological therapy with the *E. coli* Nissle 1917 strain (Mutaflor)]. *Med Klin Munich* **89**,  
799 587–93 (1994).
- 800 33. Deriu, E. *et al.* Probiotic bacteria reduce *Salmonella typhimurium* intestinal colonization by  
801 competing for iron. *Cell Host Microbe* **14**, 26–37 (2013).
- 802 34. Aron, A. *et al.* Native Electrospray-based Metabolomics Enables the Detection of Metal-  
803 binding Compounds. *bioRxiv* 824888 (2019) doi:10.1101/824888.
- 804 35. Sabri, M., Houle, S. & Dozois, C. M. Roles of the extraintestinal pathogenic *Escherichia coli*  
805 ZnuACB and ZupT zinc transporters during urinary tract infection. *Infect Immun* **77**, 1155–64  
806 (2009).
- 807 36. Damo, S. M. *et al.* Molecular basis for manganese sequestration by calprotectin and roles in  
808 the innate immune response to invading bacterial pathogens. *Proc Natl Acad Sci U A* **110**,  
809 3841–6 (2013).
- 810 37. Kehl-Fie, T. E. *et al.* Nutrient metal sequestration by calprotectin inhibits bacterial  
811 superoxide defense, enhancing neutrophil killing of *Staphylococcus aureus*. *Cell Host*  
812 *Microbe* **10**, 158–64 (2011).
- 813 38. Johnstone, T. C. & Nolan, E. M. Beyond iron: non-classical biological functions of bacterial  
814 siderophores. *Dalton Trans. Camb. Engl.* 2003 **44**, 6320–6339 (2015).

- 815 39. Koh, E.-I. *et al.* Metal selectivity by the virulence-associated yersiniabactin metallophore  
816 system. *Met. Integr. Biometal Sci.* **7**, 1011–1022 (2015).
- 817 40. Bobrov, A. G. *et al.* The *Yersinia pestis* siderophore, yersiniabactin, and the ZnuABC  
818 system both contribute to zinc acquisition and the development of lethal septicaemic plague  
819 in mice. *Mol. Microbiol.* **93**, 759–775 (2014).
- 820 41. Bobrov, A. G. *et al.* Zinc transporters YbtX and ZnuABC are required for the virulence of  
821 *Yersinia pestis* in bubonic and pneumonic plague in mice. *Met. Integr. Biometal Sci.* **9**, 757–  
822 772 (2017).
- 823 42. Gehring, A. M. *et al.* Iron acquisition in plague: modular logic in enzymatic biogenesis of  
824 yersiniabactin by *Yersinia pestis*. *Chem. Biol.* **5**, 573–586 (1998).
- 825 43. Geoffroy, V. A., Fetherston, J. D. & Perry, R. D. *Yersinia pestis* YbtU and YbtT Are Involved  
826 in Synthesis of the Siderophore Yersiniabactin but Have Different Effects on Regulation.  
827 *Infect. Immun.* **68**, 4452–4461 (2000).
- 828 44. Perry, R. D. & Fetherston, J. D. Yersiniabactin iron uptake: mechanisms and role in *Yersinia*  
829 *pestis* pathogenesis. *Microbes Infect. Inst. Pasteur* **13**, 808–817 (2011).
- 830 45. Reister, M. *et al.* Complete genome sequence of the gram-negative probiotic *Escherichia*  
831 *coli* strain Nissle 1917. *J. Biotechnol.* **187**, 106–107 (2014).
- 832 46. Valdebenito, M., Crumbliss, A. L., Winkelmann, G. & Hantke, K. Environmental factors  
833 influence the production of enterobactin, salmochelin, aerobactin, and yersiniabactin in  
834 *Escherichia coli* strain Nissle 1917. *Int J Med Microbiol* **296**, 513–20 (2006).
- 835 47. Nothias, L. F. *et al.* Feature-based Molecular Networking in the GNPS Analysis  
836 Environment. *bioRxiv* 812404 (2019) doi:10.1101/812404.
- 837 48. Wang, M. *et al.* Sharing and community curation of mass spectrometry data with Global  
838 Natural Products Social Molecular Networking. *Nat. Biotechnol.* **34**, 828–837 (2016).
- 839 49. Drechsel, H. *et al.* Structure elucidation of yersiniabactin, a siderophore from highly virulent  
840 *Yersinia* strains. *Liebigs Ann.* **1995**, 1727–1733 (1995).

- 841 50. Miller, M. C., Parkin, S., Fetherston, J. D., Perry, R. D. & Demoll, E. Crystal structure of  
842 ferric-yersiniabactin, a virulence factor of *Yersinia pestis*. *J. Inorg. Biochem.* **100**, 1495–  
843 1500 (2006).
- 844 51. Ahmadi, M. K., Fawaz, S., Jones, C. H., Zhang, G. & Pfeifer, B. A. Total Biosynthesis and  
845 Diverse Applications of the Nonribosomal Peptide-Polyketide Siderophore Yersiniabactin.  
846 *Appl. Environ. Microbiol.* **81**, 5290–5298 (2015).
- 847 52. Kobayashi, S. *et al.* Micacocidin A, B and C, novel antimycoplasma agents from  
848 *Pseudomonas* sp. II. Structure elucidation. *J. Antibiot. (Tokyo)* **51**, 328–332 (1998).
- 849 53. Gammoh, N. Z. & Rink, L. Zinc in Infection and Inflammation. *Nutrients* **9**, (2017).
- 850 54. Gillis, C. C. *et al.* Dysbiosis-Associated Change in Host Metabolism Generates Lactate to  
851 Support *Salmonella* Growth. *Cell Host Microbe* **23**, 570 (2018).
- 852 55. Faber, F. *et al.* Host-mediated sugar oxidation promotes post-antibiotic pathogen expansion.  
853 *Nature* **534**, 697–699 (2016).
- 854 56. Heesemann, J. *et al.* Virulence of *Yersinia enterocolitica* is closely associated with  
855 siderophore production, expression of an iron-repressible outer membrane polypeptide of  
856 65,000 Da and pesticin sensitivity. *Mol. Microbiol.* **8**, 397–408 (1993).
- 857 57. Farkas, E., Szabó, O., Parajdi-Losonczi, P. L., Balla, G. & Pócsi, I. Mn(II)/Mn(III) and Fe(III)  
858 binding capability of two *Aspergillus fumigatus* siderophores, desferricrocin and N', N'' , N'''-  
859 triacetylfusarinine C. *J. Inorg. Biochem.* **139**, 30–37 (2014).
- 860 58. Wright, M. H., Geszvain, K., Oldham, V. E., Luther, G. W. I. & Tebo, B. M. Oxidative  
861 Formation and Removal of Complexed Mn(III) by *Pseudomonas* Species. *Front. Microbiol.*  
862 **9**, (2018).
- 863 59. Chaturvedi, K. S., Hung, C. S., Crowley, J. R., Stapleton, A. E. & Henderson, J. P. The  
864 siderophore yersiniabactin binds copper to protect pathogens during infection. *Nat. Chem.*  
865 *Biol.* **8**, 731–736 (2012).

- 866 60. Koh, E.-I., Robinson, A. E., Bandara, N., Rogers, B. E. & Henderson, J. P. Copper import in  
867 *Escherichia coli* by the yersiniabactin metallophore system. *Nat. Chem. Biol.* **13**, 1016–1021  
868 (2017).
- 869 61. Fetherston, J. D., Kirillina, O., Bobrov, A. G., Paulley, J. T. & Perry, R. D. The Yersiniabactin  
870 Transport System Is Critical for the Pathogenesis of Bubonic and Pneumonic Plague. *Infect.*  
871 *Immun.* **78**, 2045–2052 (2010).
- 872 62. Miller, M. C. *et al.* Reduced synthesis of the Ybt siderophore or production of aberrant Ybt-  
873 like molecules activates transcription of yersiniabactin genes in *Yersinia pestis*. *Microbiology*  
874 **156**, 2226–2238 (2010).
- 875 63. Ellermann, M. *et al.* Yersiniabactin-Producing Adherent/Invasive *Escherichia coli* Promotes  
876 Inflammation-Associated Fibrosis in Gnotobiotic Il10<sup>-/-</sup> Mice. *Infect. Immun.* **87**, (2019).
- 877 64. Janben, T. *et al.* Virulence-associated genes in avian pathogenic *Escherichia coli* (APEC)  
878 isolated from internal organs of poultry having died from colibacillosis. *Int. J. Med. Microbiol.*  
879 *IJMM* **291**, 371–378 (2001).
- 880 65. Schubert, S., Rakin, A., Fischer, D., Sorsa, J. & Heesemann, J. Characterization of the  
881 integration site of *Yersinia* high-pathogenicity island in *Escherichia coli*. *FEMS Microbiol.*  
882 *Lett.* **179**, 409–414 (1999).
- 883 66. Garcia, E. C., Brumbaugh, A. R. & Mobley, H. L. T. Redundancy and specificity of  
884 *Escherichia coli* iron acquisition systems during urinary tract infection. *Infect Immun* **79**,  
885 1225–1235 (2011).
- 886 67. Paauw, A., Leverstein-van Hall, M. A., van Kessel, K. P. M., Verhoef, J. & Fluit, A. C.  
887 Yersiniabactin Reduces the Respiratory Oxidative Stress Response of Innate Immune Cells.  
888 *PLoS ONE* **4**, (2009).
- 889 68. Hayen, H. & Volmer, D. A. Different iron-chelating properties of pyochelin diastereoisomers  
890 revealed by LC/MS. *Anal. Bioanal. Chem.* **385**, 606–611 (2006).

- 891 69. Brandel, J. *et al.* Pyochelin, a siderophore of *Pseudomonas aeruginosa*: physicochemical  
892 characterization of the iron(III), copper(II) and zinc(II) complexes. *Dalton Trans. Camb. Engl.*  
893 *2003* **41**, 2820–2834 (2012).
- 894 70. Fallingborg, J. Intraluminal pH of the human gastrointestinal tract. *Dan. Med. Bull.* **46**, 183–  
895 196 (1999).
- 896 71. Press *et al.* Gastrointestinal pH profiles in patients with inflammatory bowel disease.  
897 *Aliment. Pharmacol. Ther.* **12**, 673–678 (1998).
- 898 72. Urban, C. F. *et al.* Neutrophil extracellular traps contain calprotectin, a cytosolic protein  
899 complex involved in host defense against *Candida albicans*. *PLoS Pathog.* **5**, e1000639  
900 (2009).
- 901 73. Datsenko, K. A. & Wanner, B. L. One-step inactivation of chromosomal genes in  
902 *Escherichia coli* K-12 using PCR products. *Proc Natl Acad Sci U A* **97**, 6640–5 (2000).
- 903 74. Kessner, D., Chambers, M., Burke, R., Agus, D. & Mallick, P. ProteoWizard: open source  
904 software for rapid proteomics tools development. *Bioinformatics* **24**, 2534–2536 (2008).
- 905 75. Katajamaa, M., Miettinen, J. & Oresic, M. MZmine: toolbox for processing and visualization  
906 of mass spectrometry based molecular profile data. *Bioinforma. Oxf. Engl.* **22**, 634–636  
907 (2006).
- 908 76. Pluskal, T., Castillo, S., Villar-Briones, A. & Oresic, M. MZmine 2: modular framework for  
909 processing, visualizing, and analyzing mass spectrometry-based molecular profile data.  
910 *BMC Bioinformatics* **11**, 395 (2010).
- 911 77. Aron, A. T. *et al.* Reproducible Molecular Networking Of Untargeted Mass Spectrometry  
912 Data Using GNPS. (2019) doi:10.26434/chemrxiv.9333212.v1.
- 913 78. Dührkop, K. *et al.* SIRIUS 4: a rapid tool for turning tandem mass spectra into metabolite  
914 structure information. *Nat. Methods* **16**, 299–302 (2019).

915 79. Manitz, M. P. *et al.* Loss of S100A9 (MRP14) results in reduced interleukin-8-induced  
916 CD11b surface expression, a polarized microfilament system, and diminished  
917 responsiveness to chemoattractants in vitro. *Mol Cell Biol* **23**, 1034–43 (2003).

918

919

920

921

922



923 **Figures.**

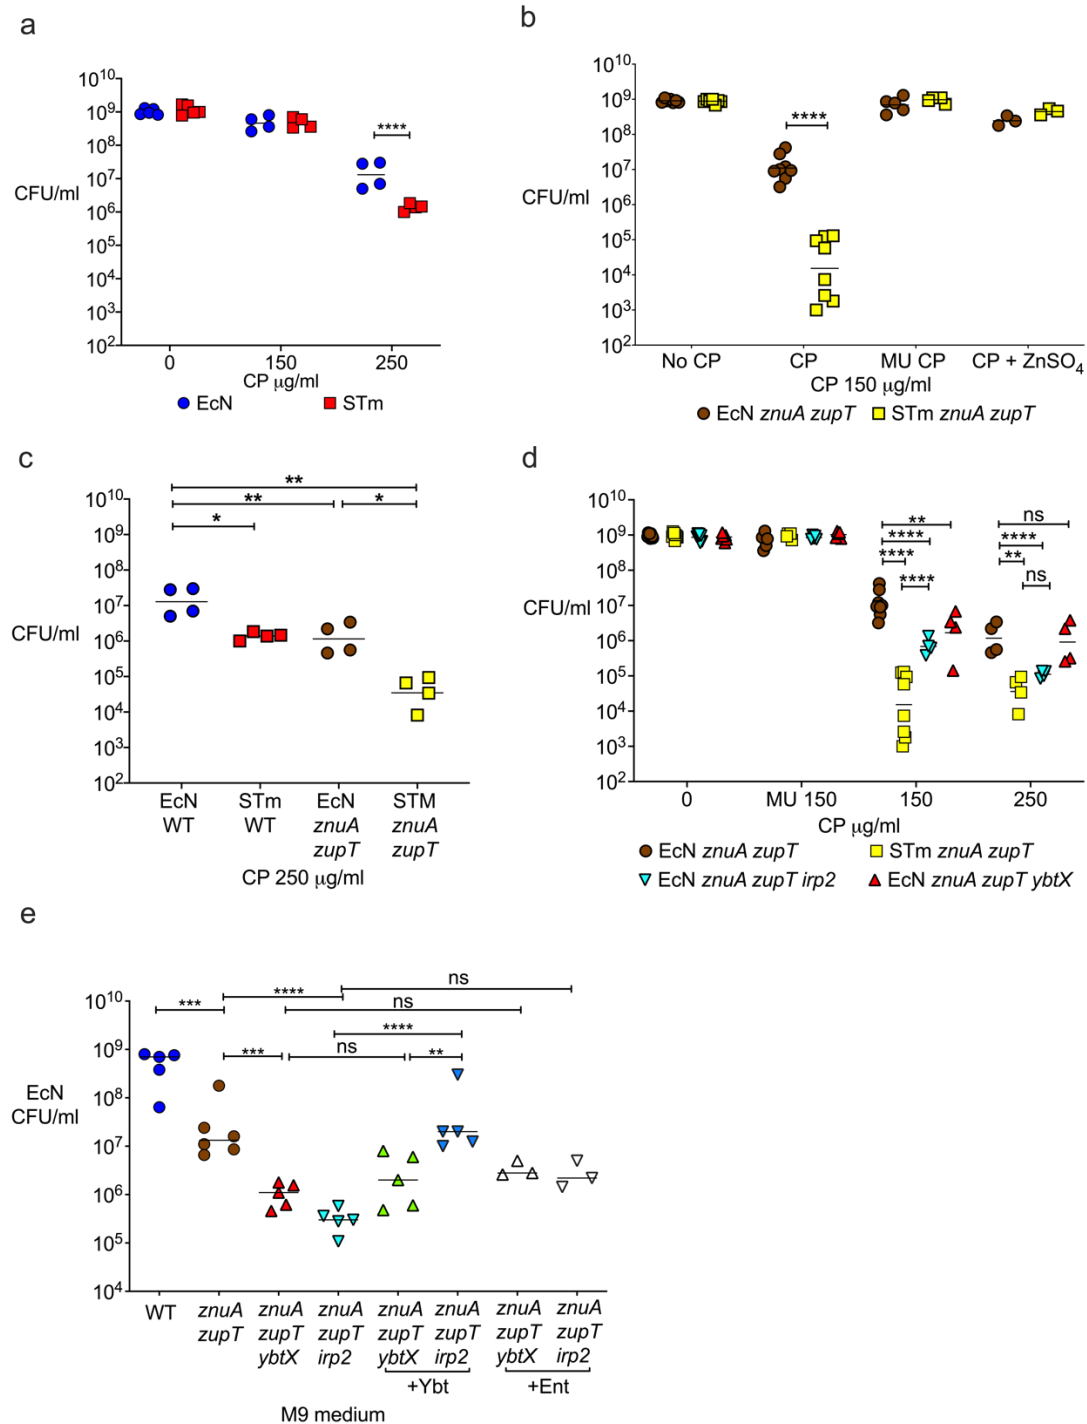

924

925 **Figure 1. *E. coli* Nissle resistance to calprotectin-mediated zinc limitation *in vitro***

926 **is dependent on ZnuABC, ZupT, and a product of the yersiniabactin operon.**

927 (a) EcN and STm wild-type were grown in modified LB medium without CP, or  
928 supplemented with 150 µg/ml or 250 µg/ml CP. (b) EcN and STm *znuA zupT* mutants  
929 were grown in modified LB medium without CP (No CP), or supplemented with 150 µg/ml  
930 CP, 150 µg/ml Site I/II knockout mutant CP (MU CP), or 150 µg/ml CP plus 5 µM ZnSO<sub>4</sub>  
931 (CP + ZnSO<sub>4</sub>). (c) EcN and STm wild-type and *znuA zupT* mutants were grown in  
932 modified LB medium supplemented with 250 µg/ml CP. (d) EcN and STm *znuA zupT*  
933 mutants, as well as EcN triple mutants (*znuA zupT irp2*; *znuA zupT ybtX*), were grown in  
934 modified LB supplemented with either 150 µg/ml mutant CP (MU 150), or with 150 µg/ml  
935 (150) or 250 µg/ml CP (250). (e) EcN wild-type and indicated double and triple mutants  
936 were grown in M9 medium or in M9 supplemented with either 1 µM yersiniabactin (Ybt)  
937 or enterobactin (Ent). (a-e) Growth was quantified by enumeration of bacterial CFU on  
938 selective media after 16 h static (a-d) or 20 h shaking (e) incubation. Data are  
939 representative of three independent experiments. Bars represent the geometric mean. \*  
940 *P* value ≤0.05; \*\* *P* value ≤0.01; \*\*\* *P* value ≤0.001, \*\*\*\* *P* value ≤0.0001; ns = not  
941 significant.

942

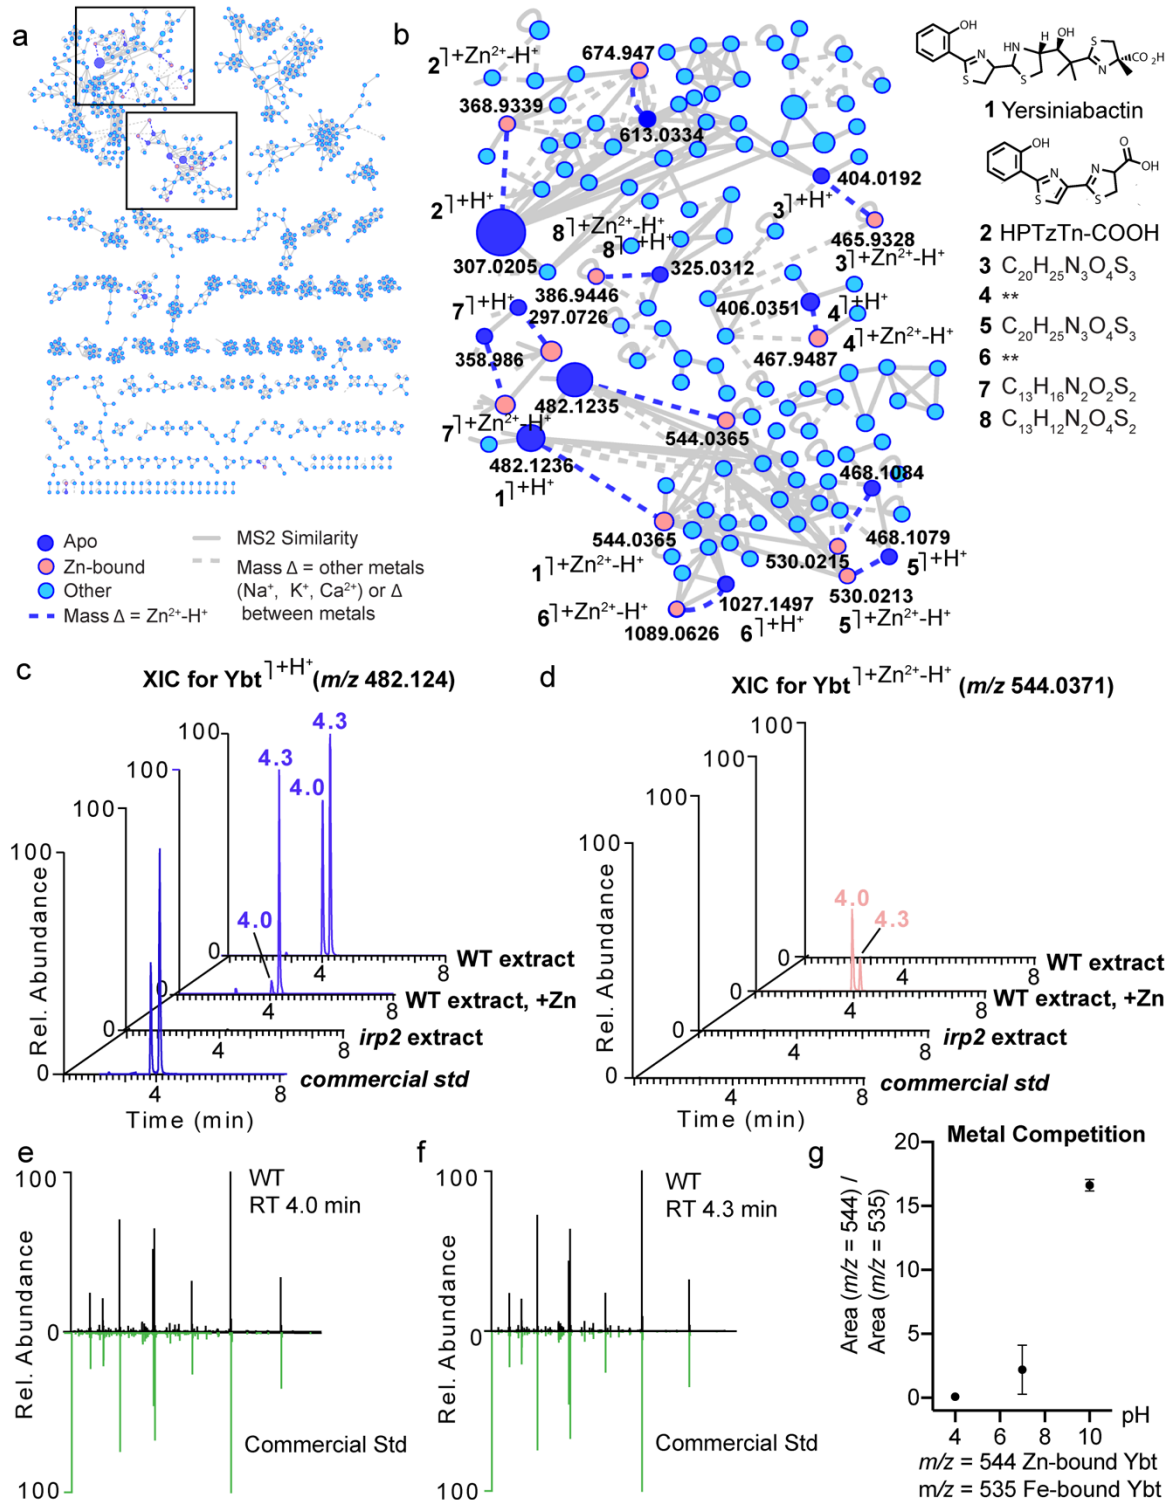

943

944 **Figure 2. Yersiniabactin is produced by *E. coli* Nissle and directly binds zinc in a**

945 **pH-dependent manner.**

946 **(a, b)** Native spray metal metabolomics was used to identify zinc-binding small molecules  
947 present in isolated EcN supernatant extracts. Zinc-binding molecules, including Ybt and  
948 various other truncations, are concentrated in the boxed molecular families enlarged in  
949 panel B. Zinc-binding small molecules are observed when post-LC infusion of  $Zn^{2+}$  and  
950 post-pH adjustment are performed. Zinc-bound molecules are shown in salmon, while the  
951 corresponding protonated (Apo) form of these molecules is shown in dark blue. Structures  
952 and molecular formulas (generated using SIRIUS 4.0 <sup>78</sup>) are provided. **(c)** Extracted ion  
953 chromatogram (XIC) for apo-Ybt ( $[M+H]^+ = 482.1236$ ) is observed as two peaks (present  
954 at 4.0 and 4.3 minutes) in wild-type EcN (WT extract); tautomerization occurring at C10  
955 results in the racemic mixture (**Fig. 3**). When post-LC pH adjustment and  $Zn^{2+}$ -infusion  
956 are performed, the majority of the peak at 4.3 remains apo-Ybt (WT extract, +Zn). Neither  
957 apo-Ybt peak is present in the EcN *irp2* knockout supernatant (*irp2* extract). Commercial  
958 Ybt (*commercial std*) also elutes with a minor peak at 4.0 and a major peak at 4.3 minutes.  
959 **(d)**  $Zn^{2+}$ -bound Ybt ( $[M+Zn^{2+}-H]^+ = 544.0371$ ) is not observed in the XIC of wild-type  
960 samples (WT extract), in *irp2* knockout samples (*irp2* extract), or in the commercial  
961 standard (*commercial std*) when the standard LC-MS/MS method is applied; however,  
962 when native spray metal metabolomics is applied (WT extract, +Zn; post-LC infusion of  
963  $Zn^{2+}$  in conjunction with pH neutralization),  $Zn^{2+}$ -bound Ybt is observed ( $[M+Zn^{2+}-H]^+ =$   
964 544.0371) as the major species in the first peak (at retention time = 4.01 minutes). **(e, f)**  
965 Mirror plots show that peaks present at **(e)** 4.0 min and **(f)** 4.3 min (black; MS/MS of  
966  $[(M+2H^+)/2 = 241.5654]$  both match the MS/MS from commercial Ybt standard (green).  
967 **(g)** Metal competition data for direct injection experiments run at pH 4, 7, and 10, in which  
968 Ybt was added to buffer in the presence of both iron and zinc. The ratio of extracted peak

969 area of Zn<sup>2+</sup>-bound Ybt ( $[M+Zn^{2+}-H]^+ = 544.0371$ ) to extracted peak area of Fe<sup>3+</sup>-bound  
970 Ybt ( $[M+Fe^{3+}-H]^+ = 535.0351$ ) is shown at each of the three tested pH values.  
971

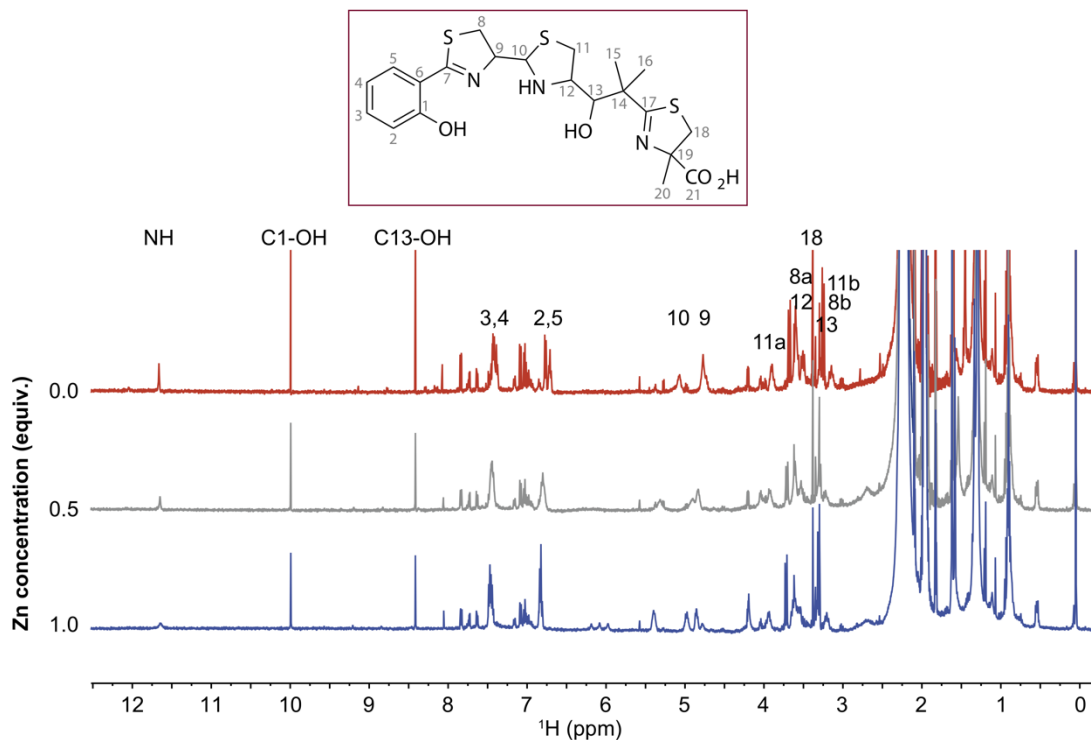

972

973 **Figure 3. 1D  $^1\text{H}$  NMR confirms direct zinc binding to yersiniabactin.**

974 1D  $^1\text{H}$  NMR spectra of Ybt dissolved in  $\text{CD}_3\text{CN}$  (top trace, 0 equivalents of Zn, red trace)  
975 as increasing zinc is titrated into the solution (0.5 equiv., gray trace), (1.0 equiv., blue  
976 trace). The loss of intensity of the NH and OH signals arises from the coordination of zinc  
977 by the corresponding N and O atoms; the signals that shift correspond to protons whose  
978 electronic environment changes due to binding of the  $\text{Zn}^{2+}$  ion. Only partial binding is  
979 observed because Ybt is in rapid equilibrium between two tautomers at C10 in addition  
980 to hydrolysis that occurs at C10<sup>49</sup>.

981

982

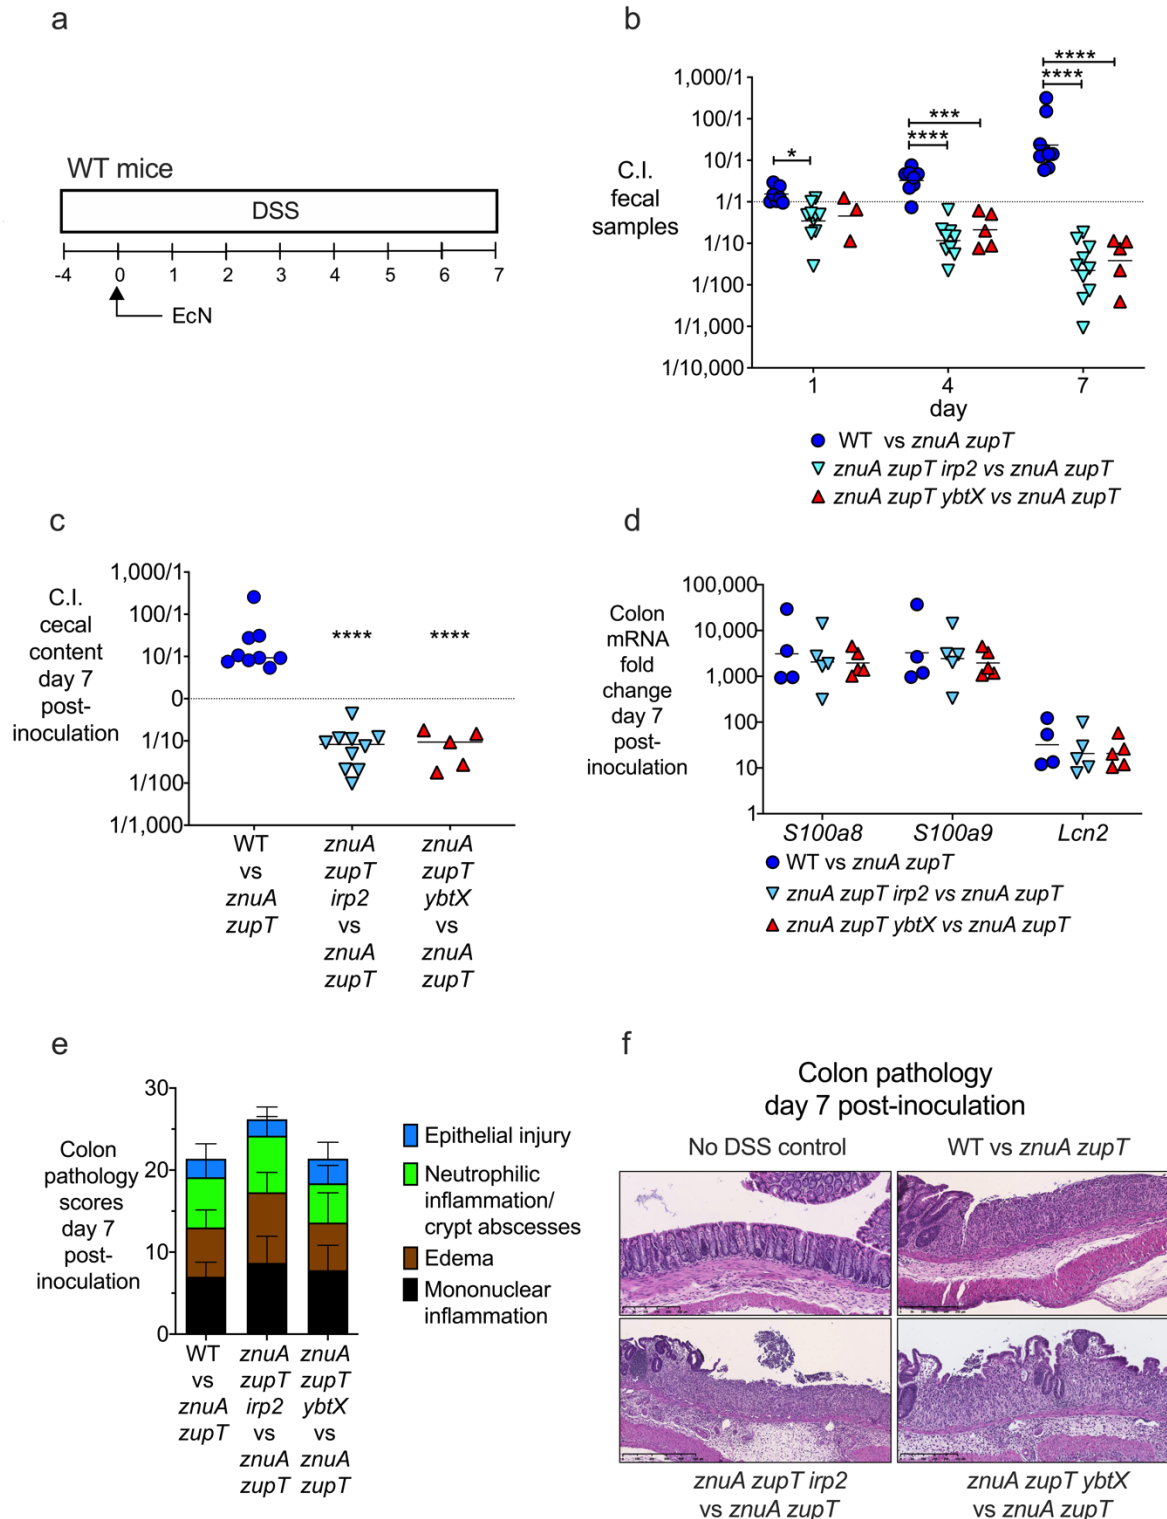

983

984 **Figure 4. The ability to acquire zinc via yersiniabactin enhances *E. coli* Nissle**

985 **colonization of the inflamed gut.**

986 (a) Experiment timeline for the DSS-induced colitis model and the administration of EcN  
987 strains. C57BL/6 mice were given 4% (w/v) DSS in the drinking water for 4 days (day -4  
988 to 0). On day 0, mice were orally gavaged with  $1 \times 10^9$  CFU of a 1:1 mixture of EcN strains.  
989 (b) Fecal samples were collected on day 1, 4, and 7, and the competitive index (C.I.) was  
990 calculated by dividing the output ratio (CFU of either wild type or one of the triple mutants  
991 / CFU of the competing *znuA zupT* strain in each group) by the CFU-enumerated input  
992 ratio of the strains. (c) Cecal content was collected on day 7 and the C.I. of strains in each  
993 group was calculated as described in B. (d) mRNA expression of *S100a8*, *S100a9* and  
994 *Lcn2* was measured in the colon of mice in panel C. (e) Colon pathology score of mice in  
995 panel C, with sub-scores of each criterion. (f) Representative stained sections (H&E,  
996 original magnification  $\times 10$ ) of distal colon from healthy or DSS-treated mice administered  
997 with different groups of EcN. (b-d) Each data point represents a single mouse. Bars  
998 represent the geometric mean. (e) Bars represent the mean. \*  $P$  value  $\leq 0.05$ ; \*\*\*  $P$  value  
999  $\leq 0.001$ , \*\*\*\*  $P$  value  $\leq 0.0001$ .

1000



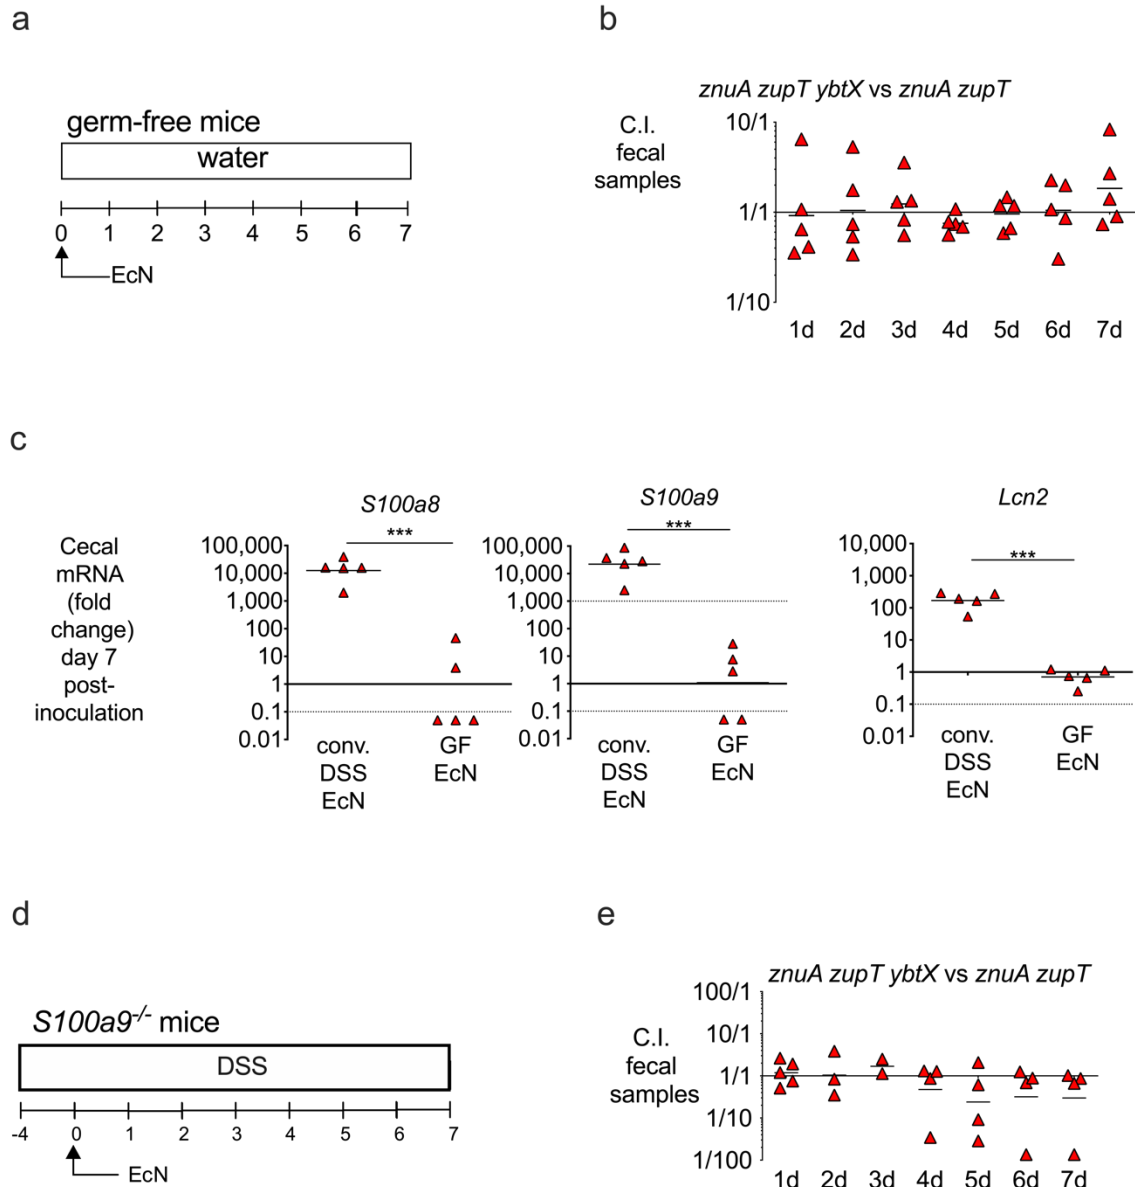

1001

1002 **Figure 5. Yersiniabactin-mediated zinc acquisition provides a competitive**  
 1003 **advantage for *E. coli* Nissle in the presence of inflammation and calprotectin.**

1004 **(a)** Experiment timeline for panel B. **(b)** Germ-free Swiss Webster mice were colonized  
 1005 with  $1 \times 10^9$  CFU of a 1:1 mixture of EcN *znuA zupT* and *znuA zupT ybtX*. Fecal samples  
 1006 were collected daily and the competitive index (C.I.) was calculated by dividing the output  
 1007 ratio (CFU of EcN *znuA zupT ybtX* / CFU of EcN *znuA zupT*) by the CFU-enumerated

1008 input ratio of the strains. (c) mRNA expression of *S100a8*, *S100a9* and *Lcn2* was  
1009 measured in the cecum of mice in panel B; conventional DSS-treated mice colonized with  
1010 EcN were used as a control. (d) Experiment timeline for panel E. (e) *S100a9*<sup>-/-</sup> mice were  
1011 given 4% (w/v) DSS in the drinking water for 4 days (day -4 to 0). On day 0, mice were  
1012 orally gavaged with 1x10<sup>9</sup> CFU of a 1:1 mixture of EcN *znuA zupT* and *znuA zupT ybtX*.  
1013 Fecal samples were collected daily and the C.I. was calculated as described for panel B.  
1014 Each data point represents a single mouse. Bars represent the geometric mean. \*\*\* *P*  
1015 value ≤0.001.  
1016
